# Supplementary material
Source: PubMed Central journal article supplement (PMC4318781)
Supplement: NIHMS641690-supplement-284_2014_724_MOESM1_ESM.pdf [file NIHMS641690-supplement-284_2014_724_MOESM1_ESM.pdf]

# Supplementary Information

*Microbispora* sp. LGMB259 Endophytic Actinomycete Isolated from *V. divergens* (Pantanal, Brazil)

## Producing $\beta$ -Carbolines and Indoles with Biological Activity

Daiani C. Savi<sup>a,b,†</sup>, Khaled A. Shaaban<sup>a,c,†</sup>, Nathalia Vargas<sup>d</sup>, Larissa V. Ponomareva<sup>a,c</sup>, Yvelise M. Possiede<sup>e</sup>, Jon S. Thorson<sup>a,c</sup>, Chirlei Glienke<sup>d#</sup> and Jürgen Rohr<sup>a#</sup>

Department of Pharmaceutical Sciences, College of Pharmacy, University of Kentucky, Lexington, Kentucky 40536-0596, U.S.A.<sup>a</sup>; Department of Microbiology, Parasitology and Pathology, Universidade Federal do Parana, Av. Coronel Francisco Heráclito dos Santos, 210. CEP: 81531-970, Curitiba, PR, Brazil<sup>b</sup>; Center for Pharmaceutical Research and Innovation (CPRI), College of Pharmacy, University of Kentucky, Lexington, Kentucky 40536-0596, U.S.A.<sup>c</sup>; Department of Genetics, Universidade Federal do Parana, PO.BOX 19071. CEP: 81531-970, Curitiba, PR, Brazil<sup>d</sup>; Department of Biology, Universidade Federal do Mato Grosso do Sul, CEP: 79070-900, Campo Grande, MS, Brazil<sup>e</sup>.

<sup>†</sup> Authors contributed equally to this work.

# Correspondencing authors: Chirlei Glienke, +5533611562, [chglienke@gmail.com](mailto:chglienke@gmail.com); Jürgen Rohr, +1 859 257 7564, [jrohr2@email.uky.edu](mailto:jrohr2@email.uky.edu)

### Table of Contents:

|                                                                                                                                                              | Page |
|--------------------------------------------------------------------------------------------------------------------------------------------------------------|------|
| <b>Figure S1:</b> Chemical structures of compounds 1-7                                                                                                       | S2   |
| <b>Figure S2:</b> Work-up scheme of <i>Microbispora</i> sp. LGMB259 using R5A-medium                                                                         | S3   |
| <b>Figure S3:</b> UV (MeOH) spectrum of 1-Vinyl- $\beta$ -carboline-3-carboxylic acid                                                                        | S4   |
| <b>Figure S4:</b> HPLC/UV/APCI-MS analyses of 1-Vinyl- $\beta$ -carboline-3-carboxylic acid (1)                                                              | S5   |
| <b>Figure S5:</b> EI-MS spectrum of 1-Vinyl- $\beta$ -carboline-3-carboxylic acid (1)                                                                        | S6   |
| <b>Figure S6:</b> (+)-HRESI-MS spectrum of 1-Vinyl- $\beta$ -carboline-3-carboxylic acid (1)                                                                 | S7   |
| <b>Figure S7:</b> (-)-HRESI-MS spectrum of 1-Vinyl- $\beta$ -carboline-3-carboxylic acid (1)                                                                 | S8   |
| <b>Figure S8:</b> <sup>1</sup> H NMR spectrum (DMSO- <i>d</i> <sub>6</sub> , 500 MHz) of 1-Vinyl- $\beta$ -carboline-3-carboxylic acid (1)                   | S9   |
| <b>Figure S9:</b> <sup>13</sup> C NMR spectrum (DMSO- <i>d</i> <sub>6</sub> , 125 MHz) of 1-Vinyl- $\beta$ -carboline-3-carboxylic acid (1)                  | S10  |
| <b>Figure S10:</b> <sup>1</sup> H- <sup>1</sup> H COSY spectrum (DMSO- <i>d</i> <sub>6</sub> , 500 MHz) of 1-Vinyl- $\beta$ -carboline-3-carboxylic acid (1) | S11  |
| <b>Figure S11:</b> HSQC spectrum (DMSO- <i>d</i> <sub>6</sub> , 500 MHz) of 1-Vinyl- $\beta$ -carboline-3-carboxylic acid (1)                                | S12  |
| <b>Figure S12:</b> HMBC spectrum (DMSO- <i>d</i> <sub>6</sub> , 500 MHz) of 1-Vinyl- $\beta$ -carboline-3-carboxylic acid (1)                                | S13  |
| <b>Figure S13:</b> HPLC/UV/APCI-MS analyses of JBIR-133 (2)                                                                                                  | S14  |
| <b>Figure S14:</b> <sup>1</sup> H NMR spectrum (DMSO- <i>d</i> <sub>6</sub> , 500 MHz) of JBIR-133 (2)                                                       | S15  |
| <b>Figure S15:</b> <sup>13</sup> C NMR spectrum (DMSO- <i>d</i> <sub>6</sub> , 125 MHz) of JBIR-133 (2)                                                      | S16  |

|                                                                                                                                                                            |     |
|----------------------------------------------------------------------------------------------------------------------------------------------------------------------------|-----|
| <b>Figure S16:</b> $^1\text{H}$ - $^1\text{H}$ COSY spectrum (DMSO- $d_6$ , 500 MHz) of JBIR-133 ( <b>2</b> )                                                              | S17 |
| <b>Figure S17:</b> HSQC spectrum (DMSO- $d_6$ , 500 MHz) of JBIR-133 ( <b>2</b> )                                                                                          | S18 |
| <b>Figure S18:</b> HMBC spectrum (DMSO- $d_6$ , 500 MHz) of JBIR-133 ( <b>2</b> )                                                                                          | S19 |
| <b>Figure S19:</b> HPLC/UV/APCI-MS analyses of Kitasetaline ( <b>3</b> )                                                                                                   | S20 |
| <b>Figure S20:</b> $^1\text{H}$ NMR spectrum (DMSO- $d_6$ , 500 MHz) of Kitasetaline ( <b>3</b> )                                                                          | S21 |
| <b>Figure S21:</b> $^{13}\text{C}$ NMR spectrum (DMSO- $d_6$ , 125 MHz) of Kitasetaline ( <b>3</b> )                                                                       | S22 |
| <b>Figure S22:</b> $^1\text{H}$ - $^1\text{H}$ COSY spectrum (DMSO- $d_6$ , 500 MHz) of Kitasetaline ( <b>3</b> )                                                          | S23 |
| <b>Figure S23:</b> HSQC spectrum (DMSO- $d_6$ , 500 MHz) of Kitasetaline ( <b>3</b> )                                                                                      | S24 |
| <b>Figure S24:</b> HMBC spectrum (DMSO- $d_6$ , 500 MHz) of Kitasetaline ( <b>3</b> )                                                                                      | S25 |
| <b>Figure S25:</b> HPLC/UV/APCI-MS analyses of 1-(Propionic acid)- $\beta$ -carboline-3-carboxylic acid methyl ester ( <b>4</b> )                                          | S26 |
| <b>Figure S26:</b> $^1\text{H}$ NMR spectrum (DMSO- $d_6$ , 500 MHz) 1-(Propionic acid)- $\beta$ -carboline-3-carboxylic acid methyl ester ( <b>4</b> )                    | S27 |
| <b>Figure S27:</b> $^{13}\text{C}$ NMR spectrum (DMSO- $d_6$ , 125 MHz) of 1-(Propionic acid)- $\beta$ -carboline-3-carboxylic acid methyl ester ( <b>4</b> )              | S28 |
| <b>Figure S28:</b> $^1\text{H}$ - $^1\text{H}$ COSY spectrum (DMSO- $d_6$ , 500 MHz) of 1-(Propionic acid)- $\beta$ -carboline-3-carboxylic acid methyl ester ( <b>4</b> ) | S29 |
| <b>Figure S29:</b> HSQC spectrum (DMSO- $d_6$ , 500 MHz) of 1-(Propionic acid)- $\beta$ -carboline-3-carboxylic acid methyl ester ( <b>4</b> )                             | S30 |
| <b>Figure S30:</b> HMBC spectrum (DMSO- $d_6$ , 500 MHz) of 1-(Propionic acid)- $\beta$ -carboline-3-carboxylic acid methyl ester ( <b>4</b> )                             | S31 |
| <b>Figure S31:</b> HPLC/UV/APCI-MS analyses of Indole-3-carbaldehyde ( <b>5</b> )                                                                                          | S32 |
| <b>Figure S32:</b> $^1\text{H}$ NMR spectrum (DMSO- $d_6$ , 500 MHz) of Indole-3-carbaldehyde ( <b>5</b> )                                                                 | S33 |
| <b>Figure S33:</b> HSQC spectrum (DMSO- $d_6$ , 500 MHz) of Indole-3-carbaldehyde ( <b>5</b> )                                                                             | S34 |
| <b>Figure S34:</b> HPLC/UV/APCI-MS analyses of Indole-3-carboxylic acid ( <b>6</b> )                                                                                       | S35 |
| <b>Figure S35:</b> $^1\text{H}$ NMR spectrum (DMSO- $d_6$ , 500 MHz) of Indole-3-carboxylic acid ( <b>6</b> )                                                              | S36 |
| <b>Figure S36:</b> $^{13}\text{C}$ NMR spectrum (DMSO- $d_6$ , 125 MHz) of Indole-3-carboxylic acid ( <b>6</b> )                                                           | S37 |
| <b>Figure S37:</b> HPLC/UV/APCI-MS analyses of Indole-3-acetic acid ( <b>7</b> )                                                                                           | S38 |
| <b>Figure S38:</b> $^1\text{H}$ NMR spectrum (DMSO- $d_6$ , 500 MHz) of Indole-3-acetic acid ( <b>7</b> )                                                                  | S39 |
| <b>Figure S39:</b> $^{13}\text{C}$ NMR spectrum (DMSO- $d_6$ , 125 MHz) of Indole-3-acetic acid ( <b>7</b> )                                                               | S40 |

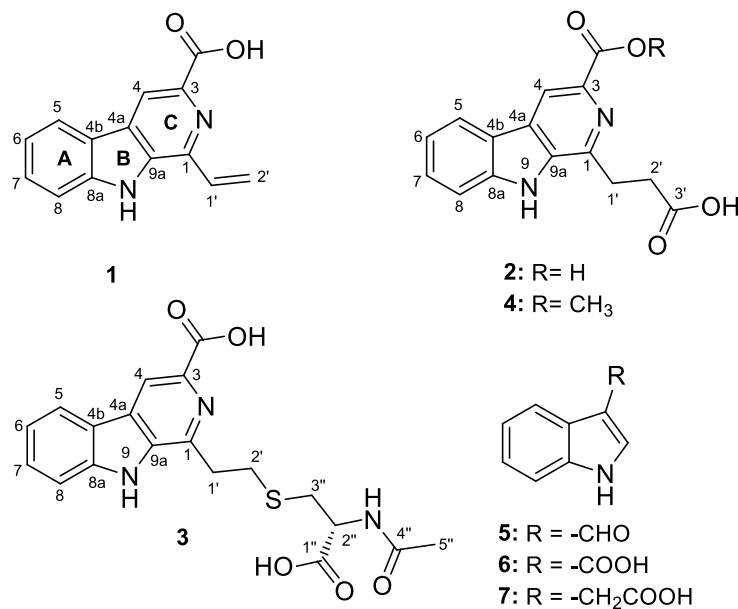

**Figure S1:** Chemical structure of compounds 1-7

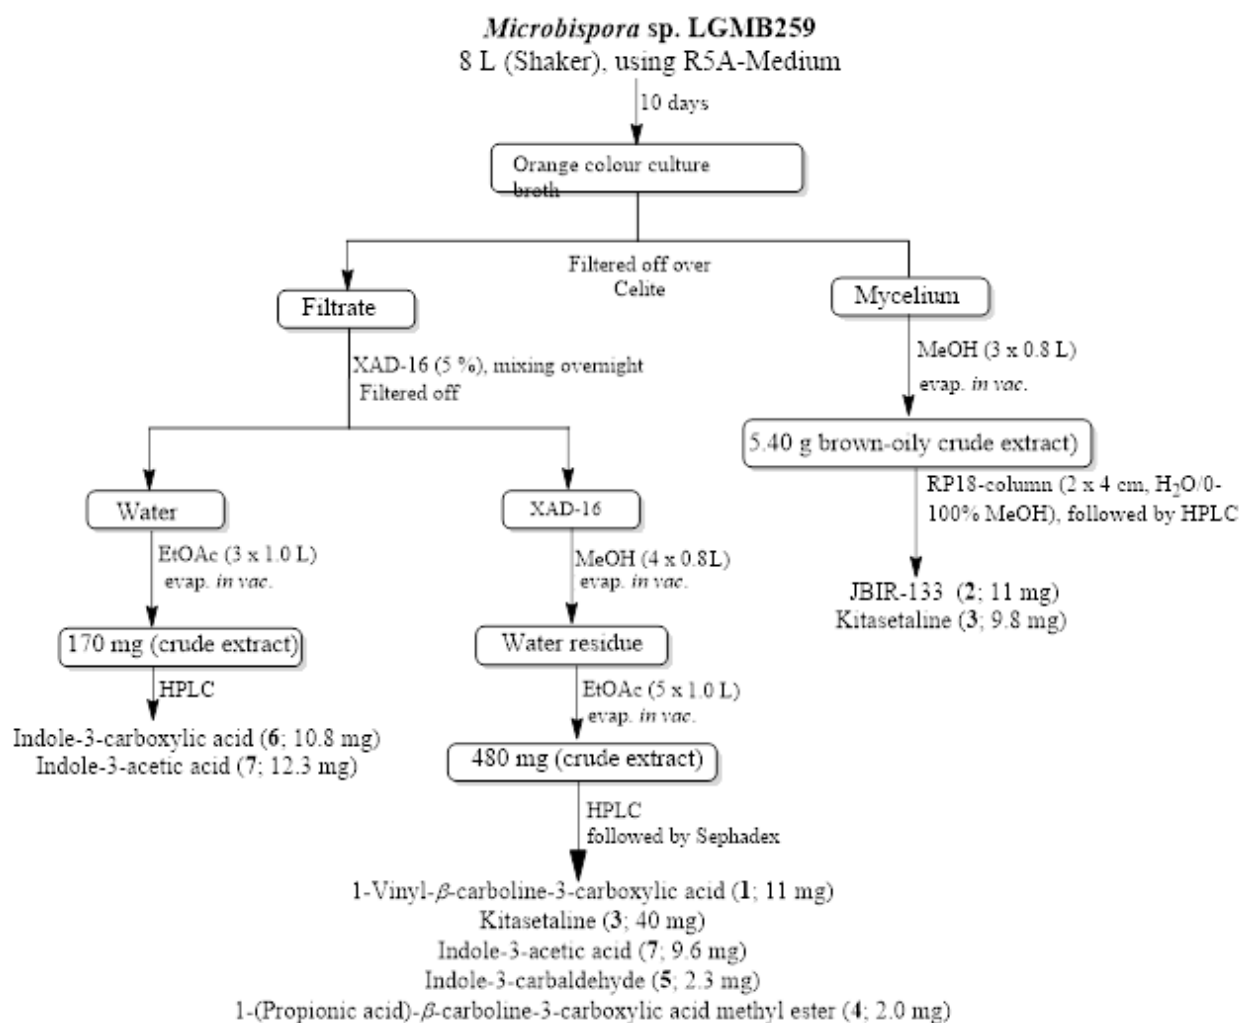

**Figure S2:** Work-up scheme of *Microbispora* sp. LGMB259 using R5A-medium

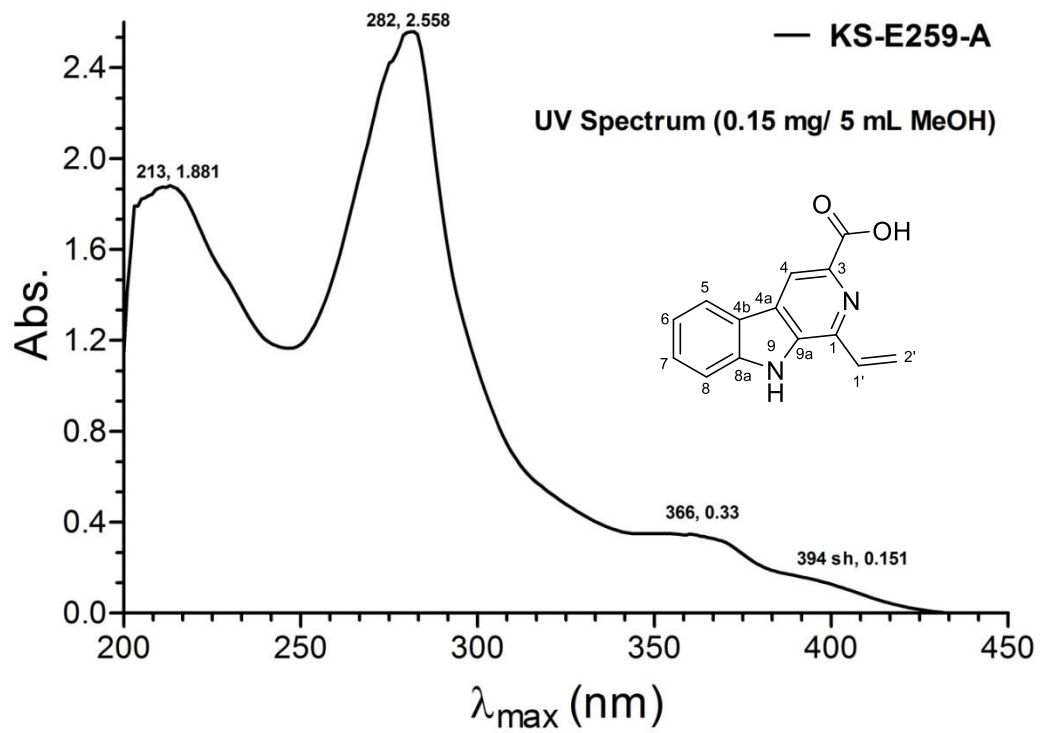

**Figure S3:** UV (MeOH) spectrum of 1-Vinyl- $\beta$ -carboline-3-carboxylic acid (**1**)

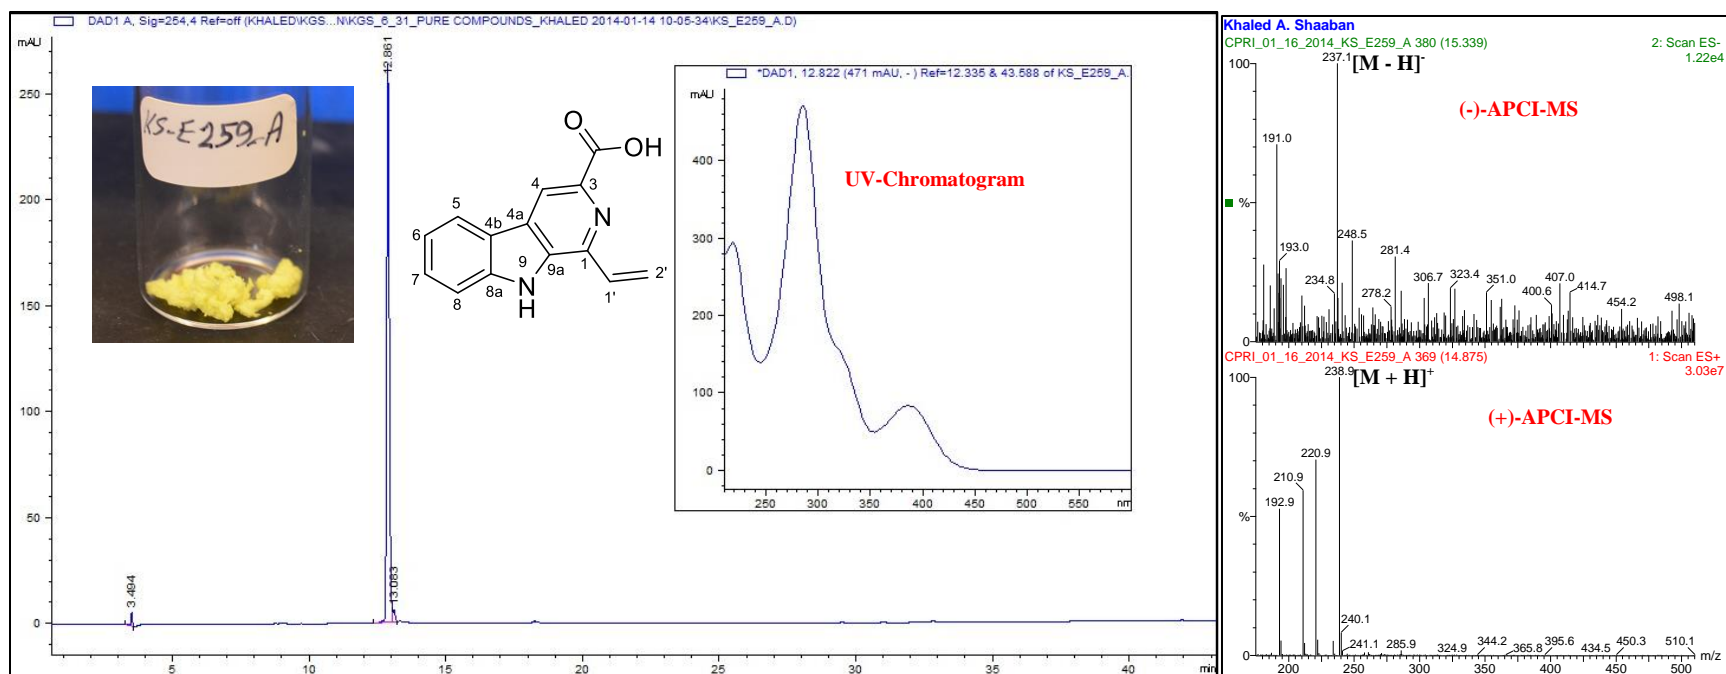

**Figure S4:** HPLC/UV/APCI-MS analyses of 1-Vinyl- $\beta$ -carboline-3-carboxylic acid (**1**). HPLC-conditions: Detection wavelength 254 nm; solvent A: H<sub>2</sub>O/0.1% TFA; solvent B: acetonitrile; flow rate: 1.0 mL min<sup>-1</sup>; 0-35 min, 95-0% A (linear gradient); 35-40 min 0% A; 40-41 min 0-95% A (linear gradient); 41-45 min 95% A.

13-0533 #172-193 RT: 2.92-3.26 AV: 22 SB: 8 0.88-1.00 NL: 3.75E5

T: + c Full ms [ 40.00-750.00]

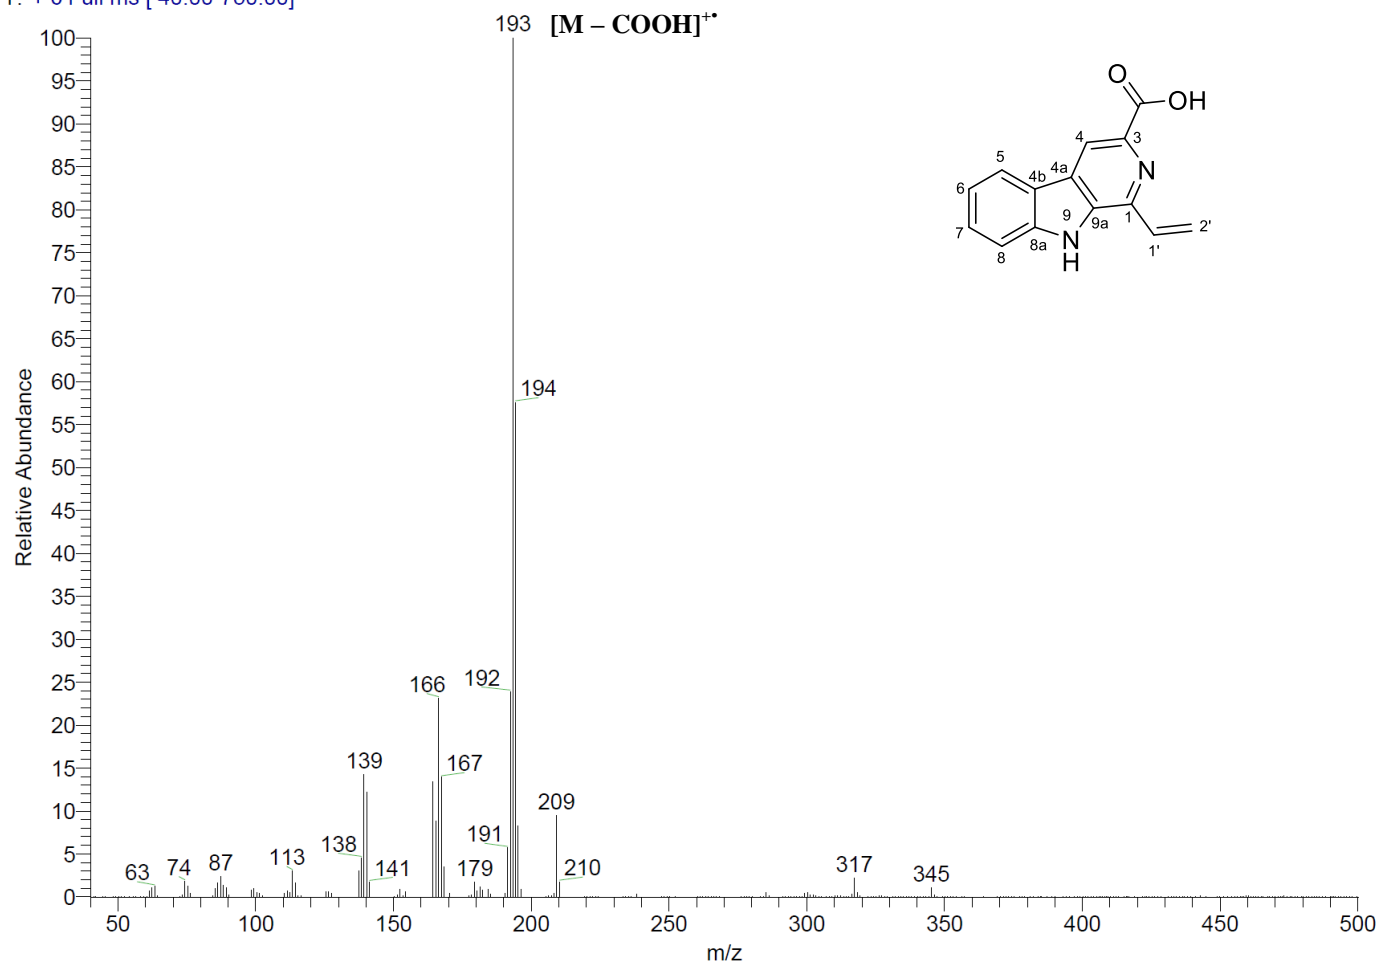

Figure S5: EI-MS spectrum of 1-Vinyl- $\beta$ -carboline-3-carboxylic acid (1)

13-0533 #30-38 RT: 0.85-1.08 AV: 9 NL: 1.45E9

T: FTMS + p ESI Full lock ms [50.00-750.00]

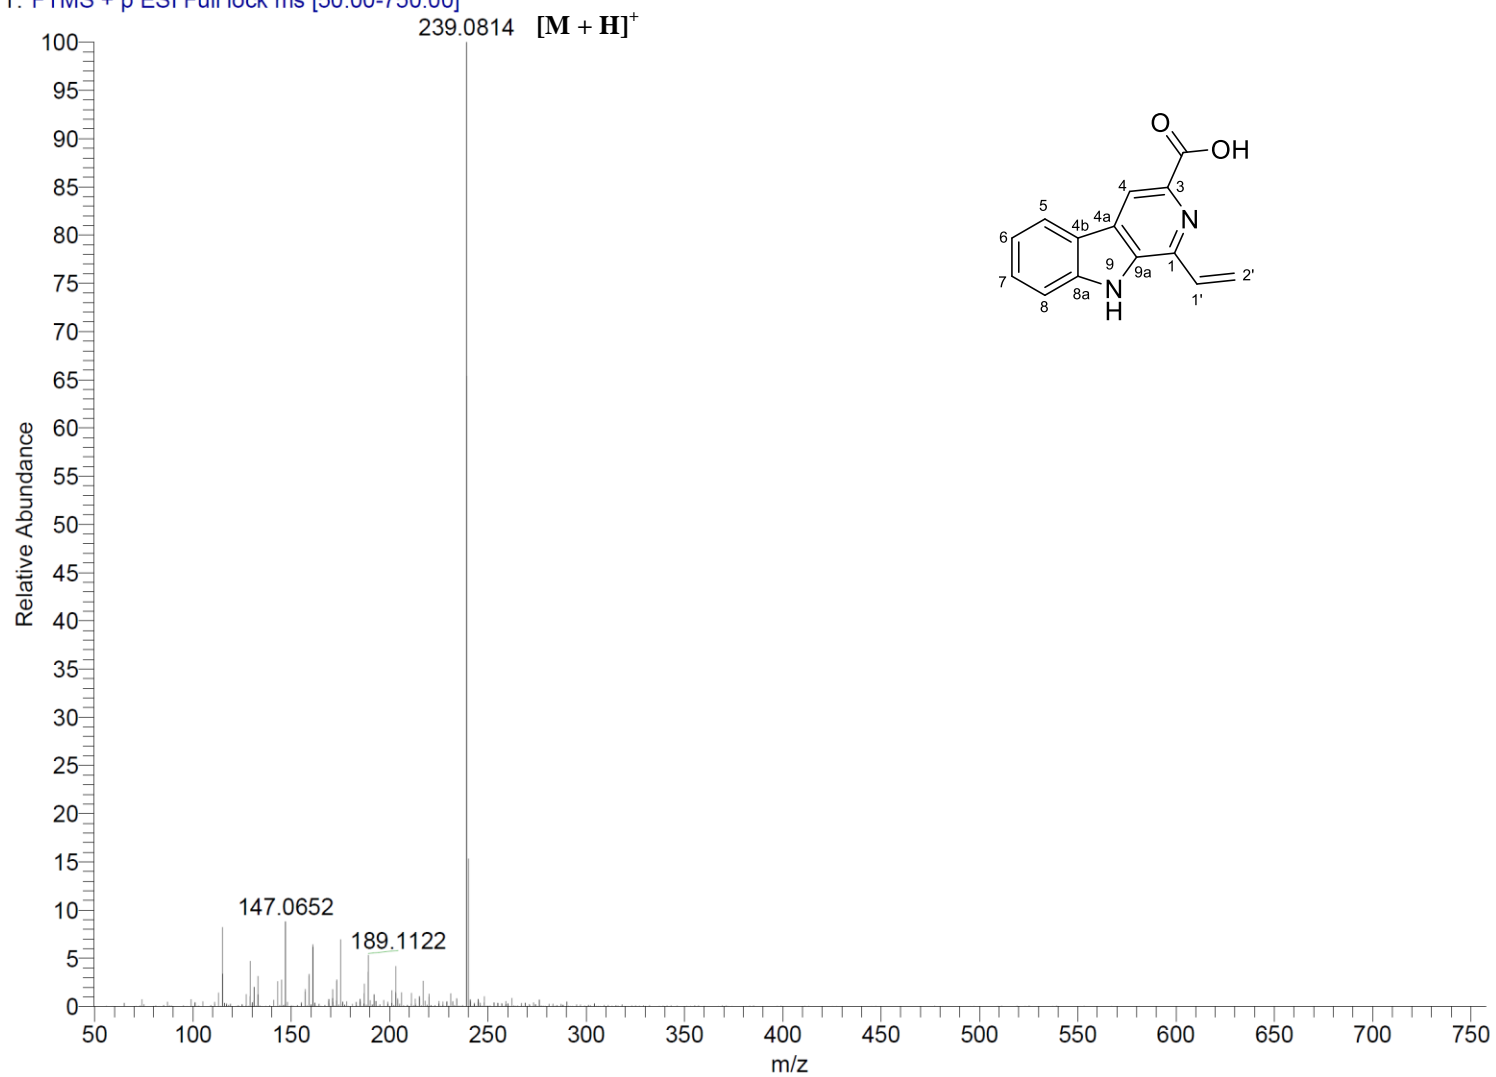**Figure S6:** (+)-HRESI-MS spectrum of 1-Vinyl- $\beta$ -carboline-3-carboxylic acid (**1**)

13-0533 #72-80 RT: 2.06-2.29 AV: 9 NL: 2.71E7  
T: FTMS - p ESI Full ms [100.00-750.00]

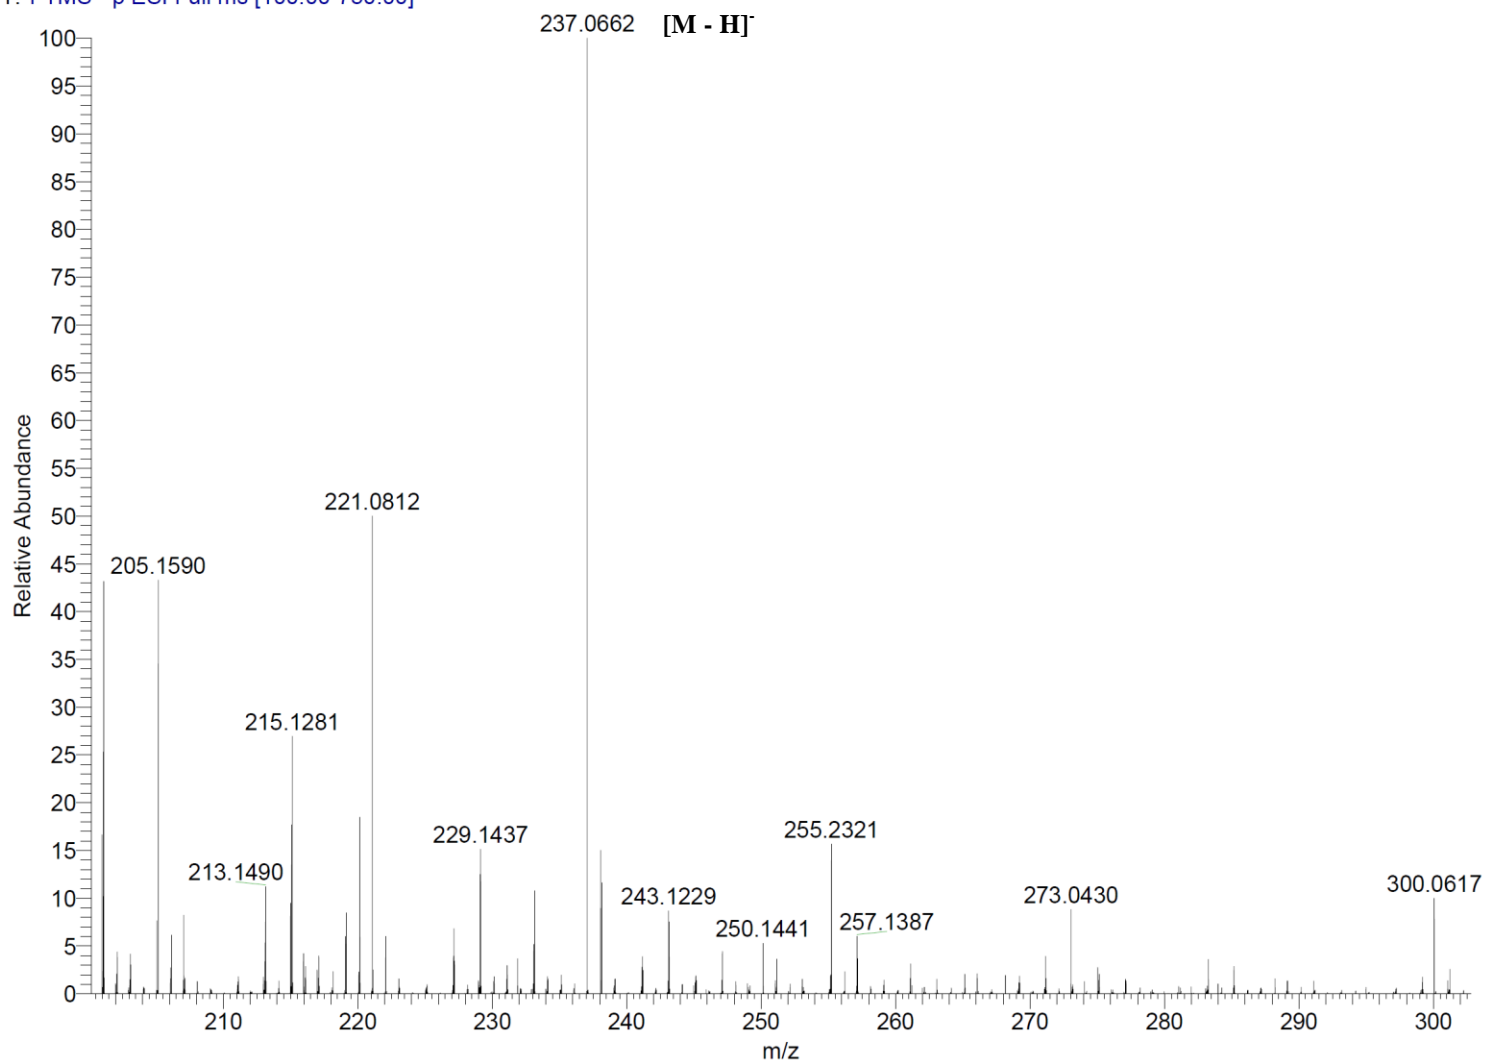

**Figure S7:** (-)-HRESI-MS spectrum of 1-Vinyl- $\beta$ -carboline-3-carboxylic acid (1)



KS\_E259\_A\_1HNMR\_DMSO\_01\_16\_2014  
500 MHz, DMSO-d6, nt=32  
Khaled A. Shaaban

Sample: khaled\_A\_Shaaban  
File: xp

Pulse Sequence: s2pul

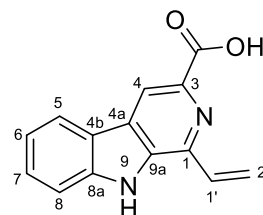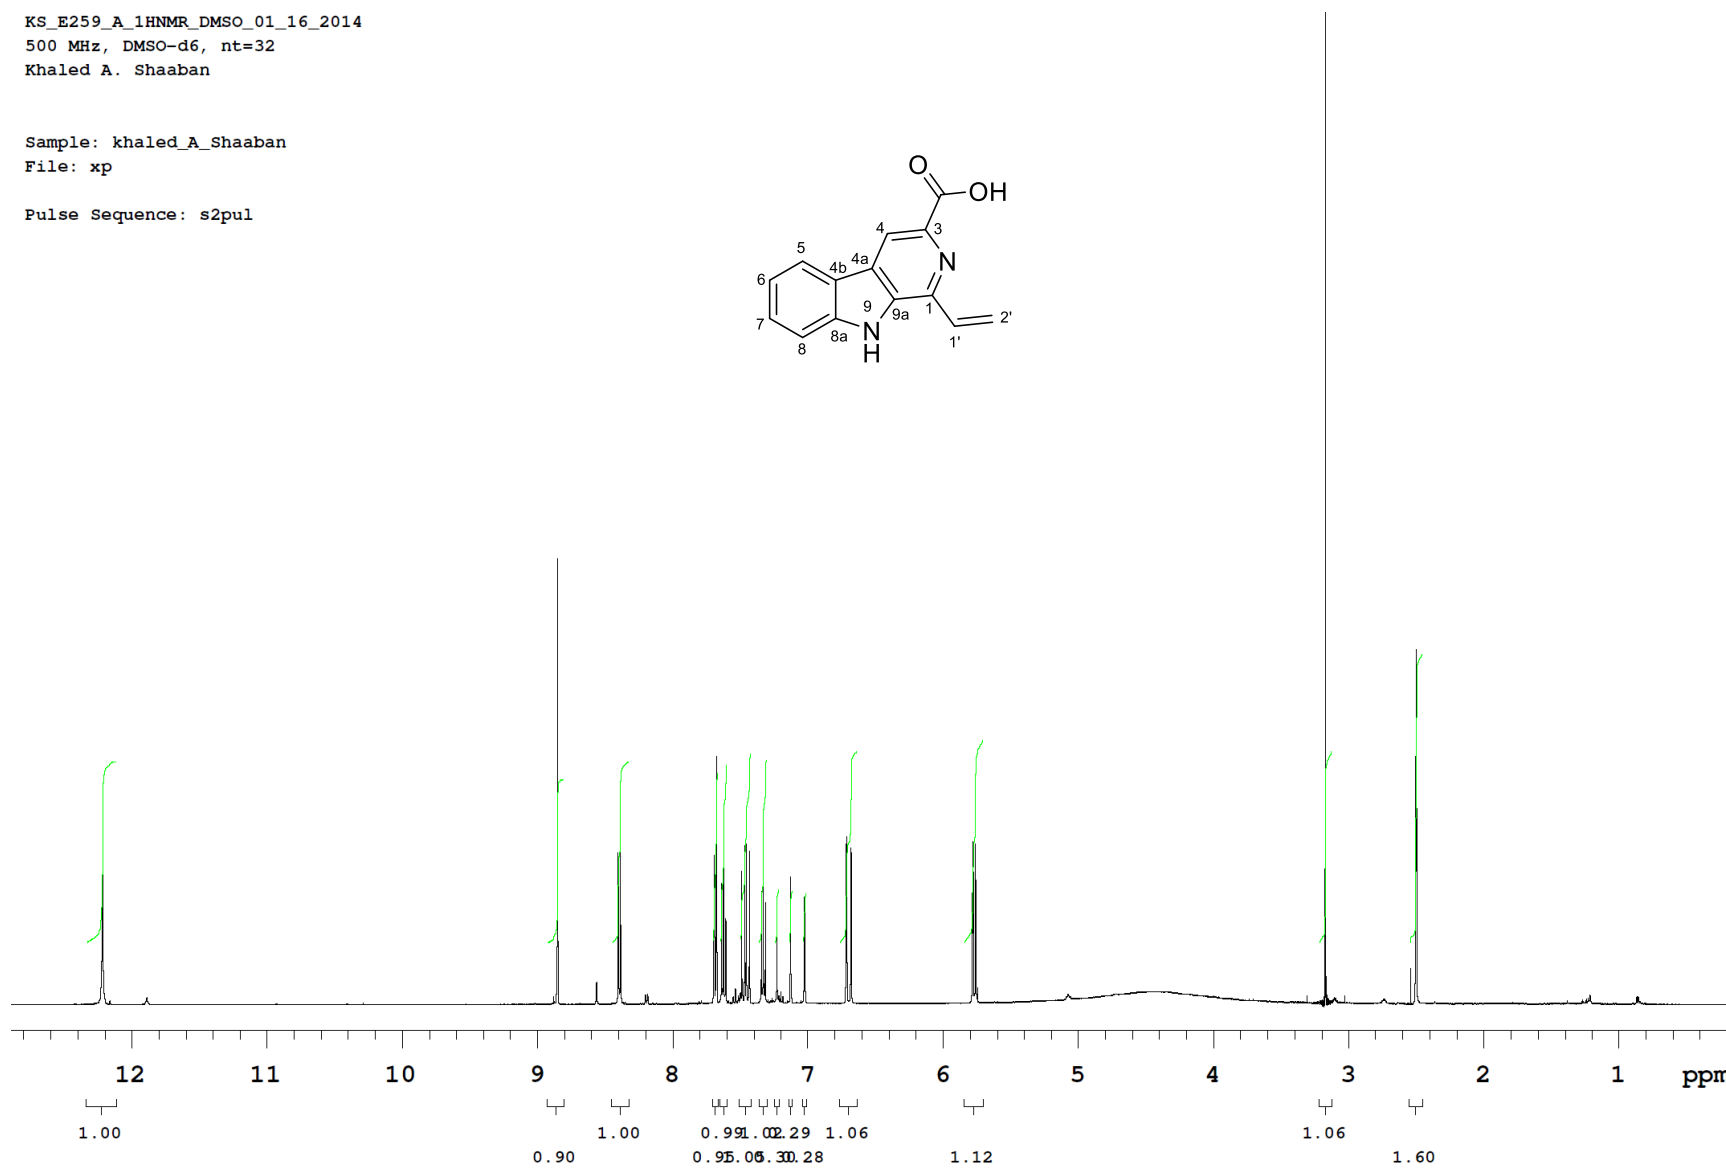

Figure S8: <sup>1</sup>H NMR spectrum (DMSO-*d*<sub>6</sub>, 500 MHz) of 1-Vinyl-β-carboline-3-carboxylic acid (1)

KS\_E259\_A\_13CNMR\_DMSO\_01\_23\_2014  
125 MHz, DMSO-d6, 15 hrs  
Khaled A. Shaaban

Sample: khaled\_A\_Shaaban  
File: xp

Pulse Sequence: s2pul

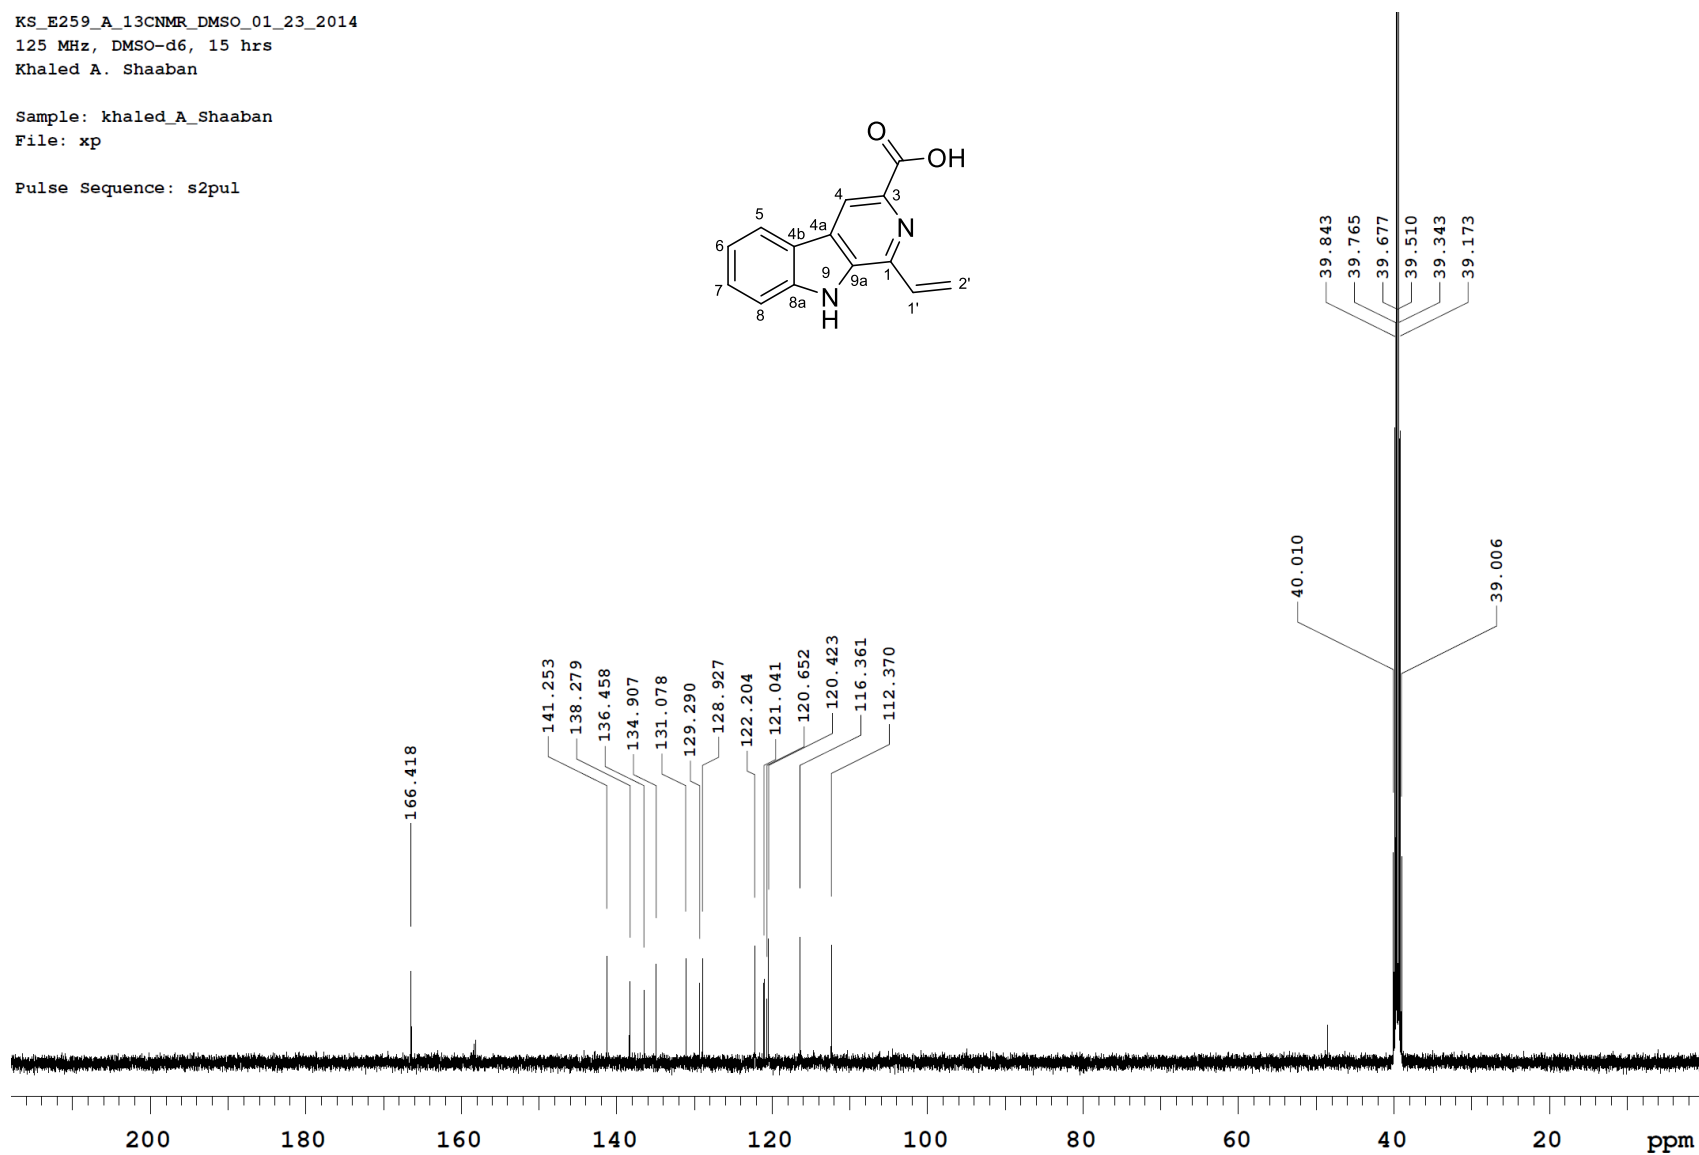

Figure S9: <sup>13</sup>C NMR spectrum (DMSO-d<sub>6</sub>, 125 MHz) of 1-Vinyl-β-carboline-3-carboxylic acid (1)

KS\_E259\_A\_gCOSY\_DMSO\_01\_16\_2014  
500 MHz, DMSO-d<sub>6</sub>, 60 mins  
Khaled A. Shaaban

Sample: khaled\_A\_Shaaban  
File: xp

Pulse Sequence: gCOSY

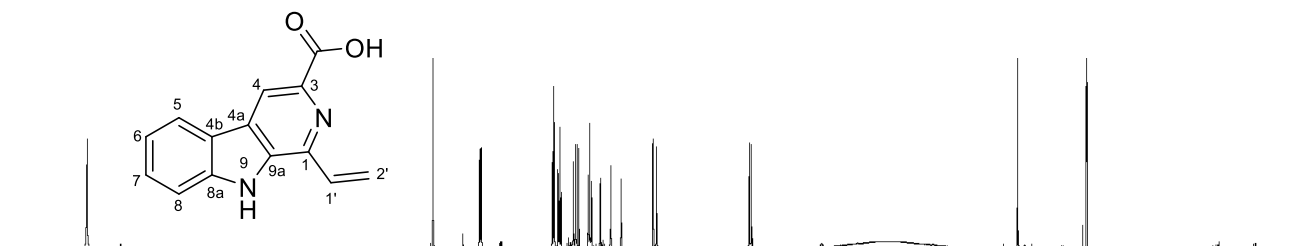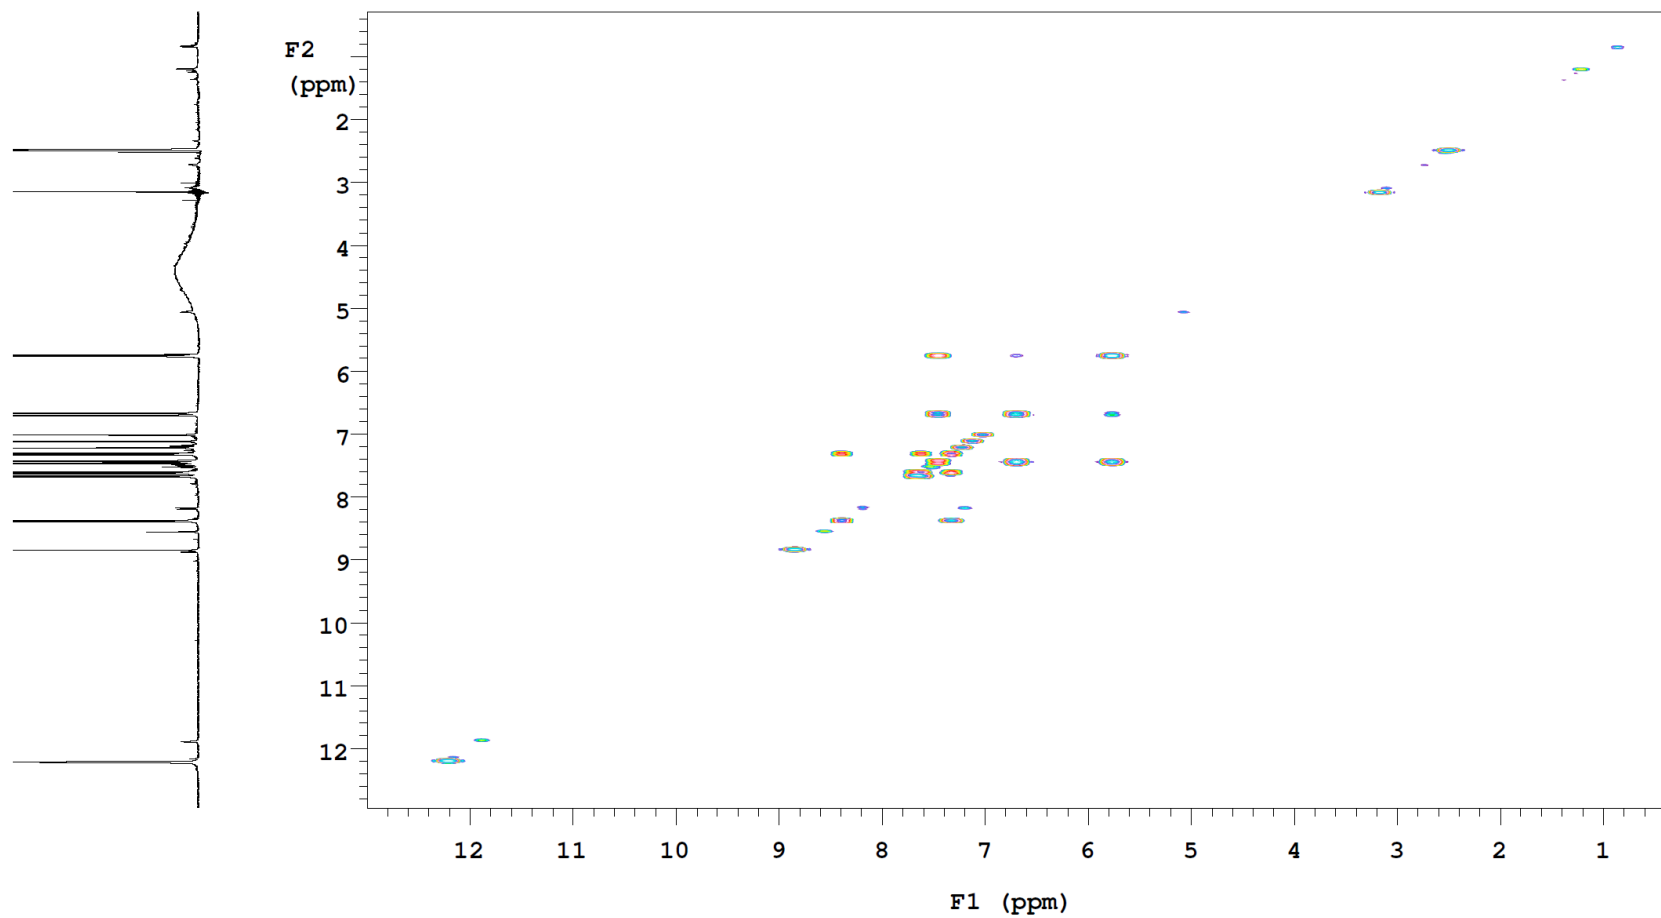

Figure S10: <sup>1</sup>H-<sup>1</sup>H COSY spectrum (DMSO-*d*<sub>6</sub>, 500 MHz) of 1-Vinyl-β-carboline-3-carboxylic acid (**1**)

KS\_E259\_A\_gHSQC\_DMSO\_01\_24\_2014  
500 MHz, DMSO-d6, 3 hrs  
Khaled A. Shaaban

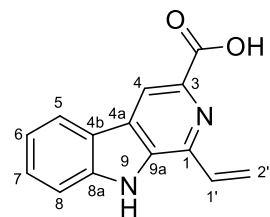

Sample: Khaled\_A\_Shaaban  
File: xp

Pulse Sequence: gHSQC

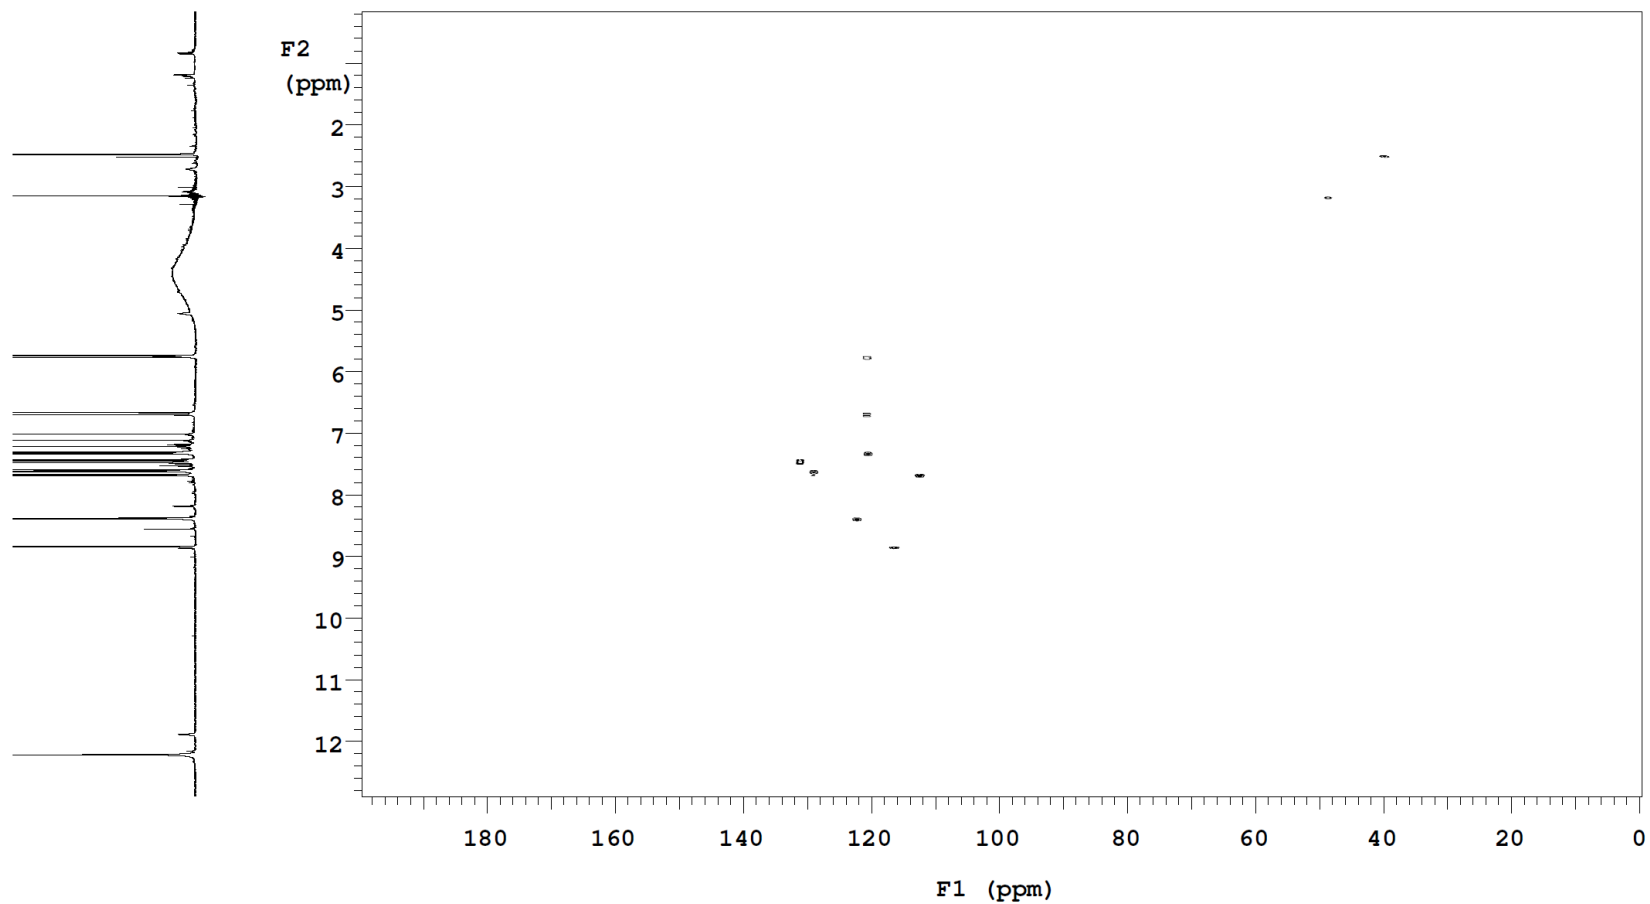

Figure S11: HSQC spectrum (DMSO- $d_6$ , 500 MHz) of 1-Vinyl- $\beta$ -carboline-3-carboxylic acid (1)

KS\_E259\_A\_gHMBC\_DMSO\_01\_24\_2014  
500 MHz, DMSO-d<sub>6</sub>, 12 hrs  
Khaled A. Shaaban

Sample: khaled\_A\_Shaaban  
File: xp

Pulse Sequence: gHMBC

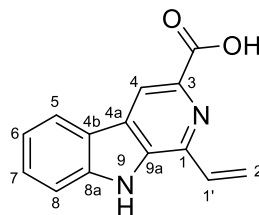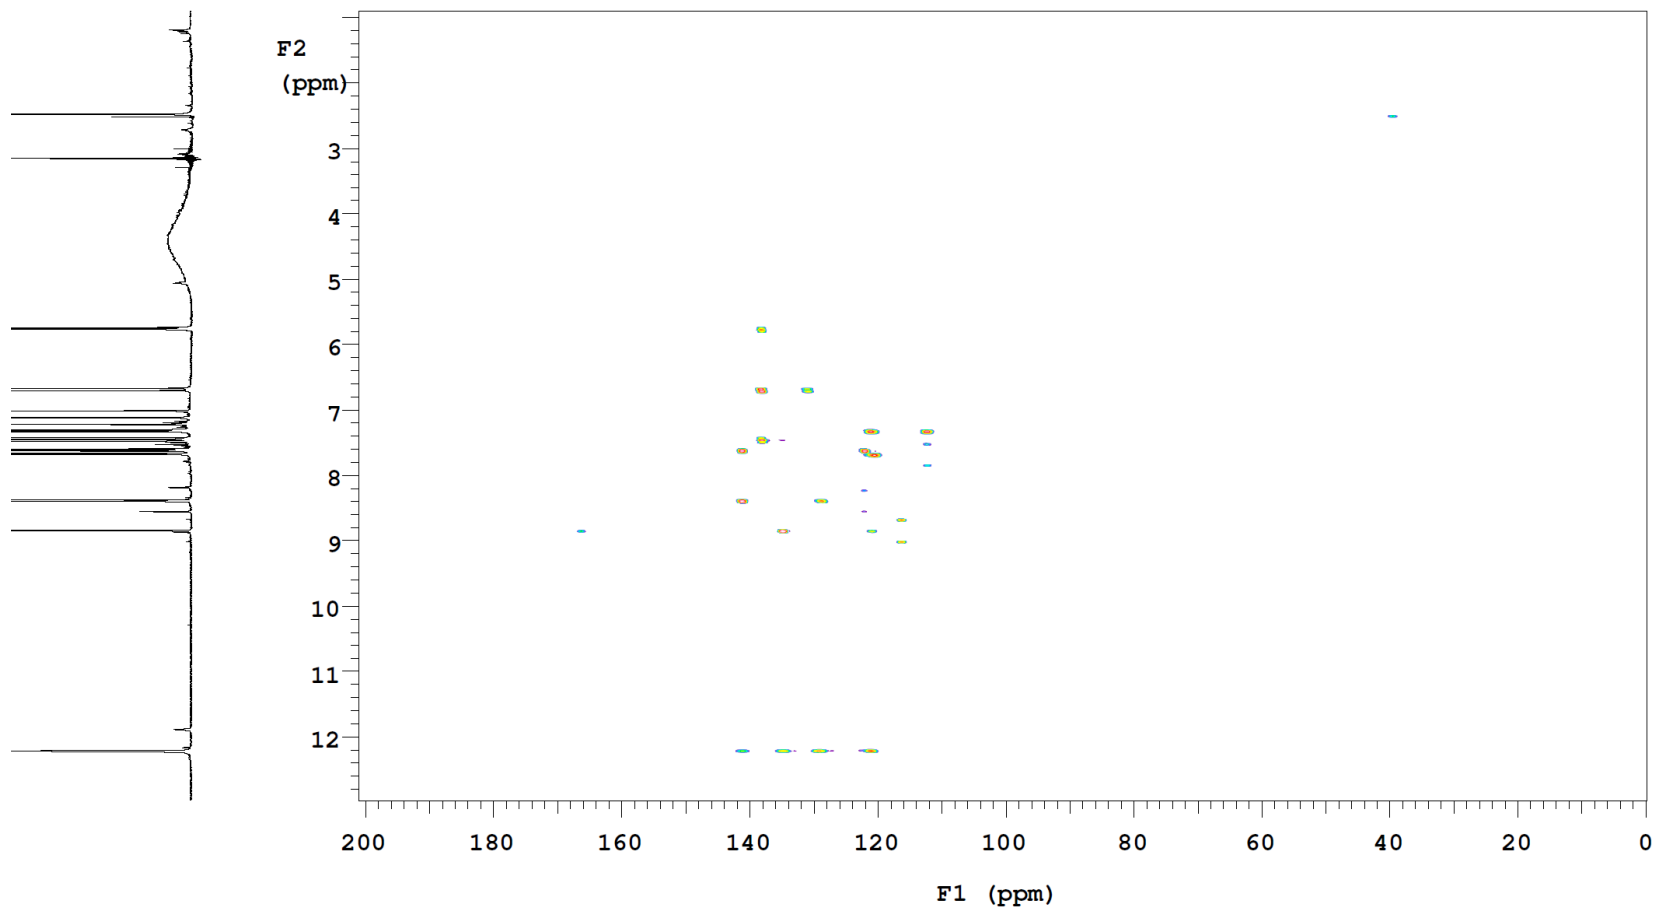

Figure S12: HMBC spectrum (DMSO-*d*<sub>6</sub>, 500 MHz) of 1-Vinyl- $\beta$ -carboline-3-carboxylic acid (1)

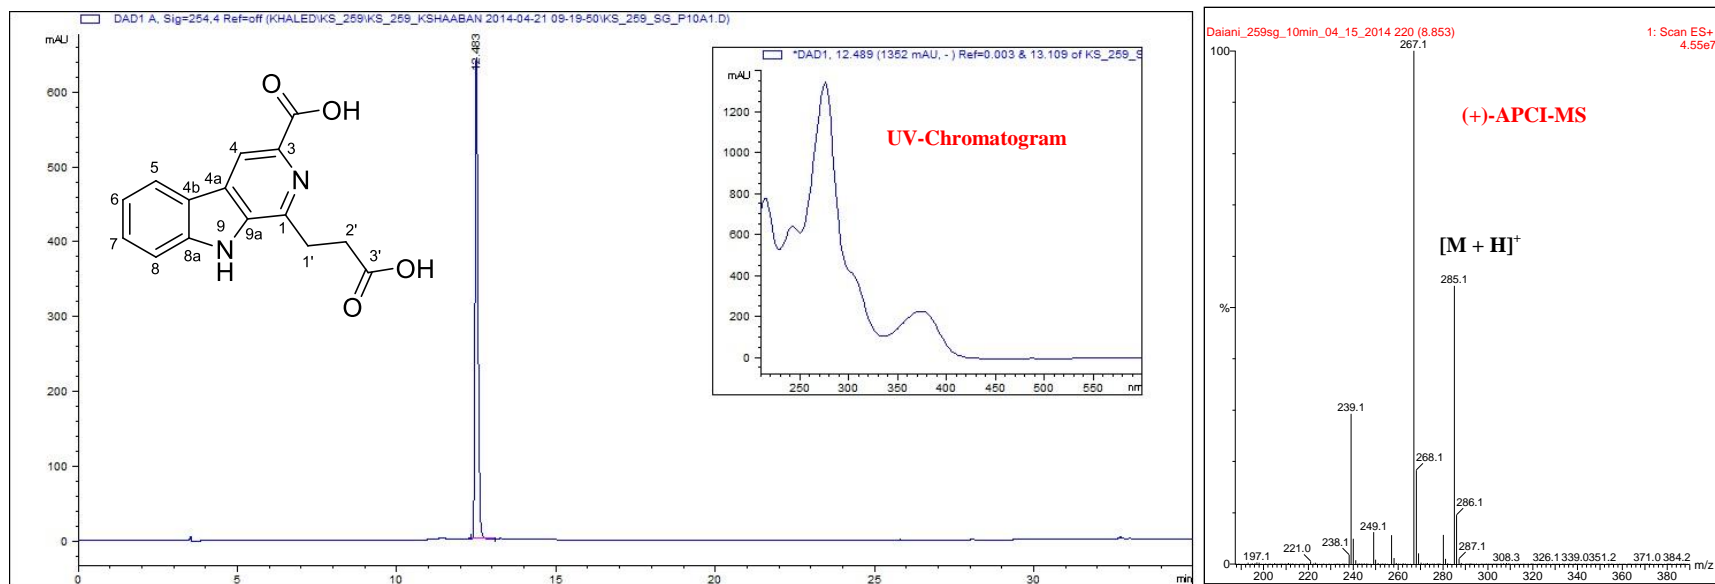

**Figure S13:** HPLC/UV/APCI-MS analyses of JBIR-133 (**2**). HPLC-conditions: Detection wavelength 254 nm; solvent A: H<sub>2</sub>O/0.1% Formic acid; solvent B: acetonitrile; flow rate: 1.0 mL min<sup>-1</sup>; 0-35 min, 95-0% A (linear gradient); 35-40 min 0-95% A (linear gradient).

Sample: Khaled\_A\_Shaaban  
File: xp

Pulse Sequence: s2pul

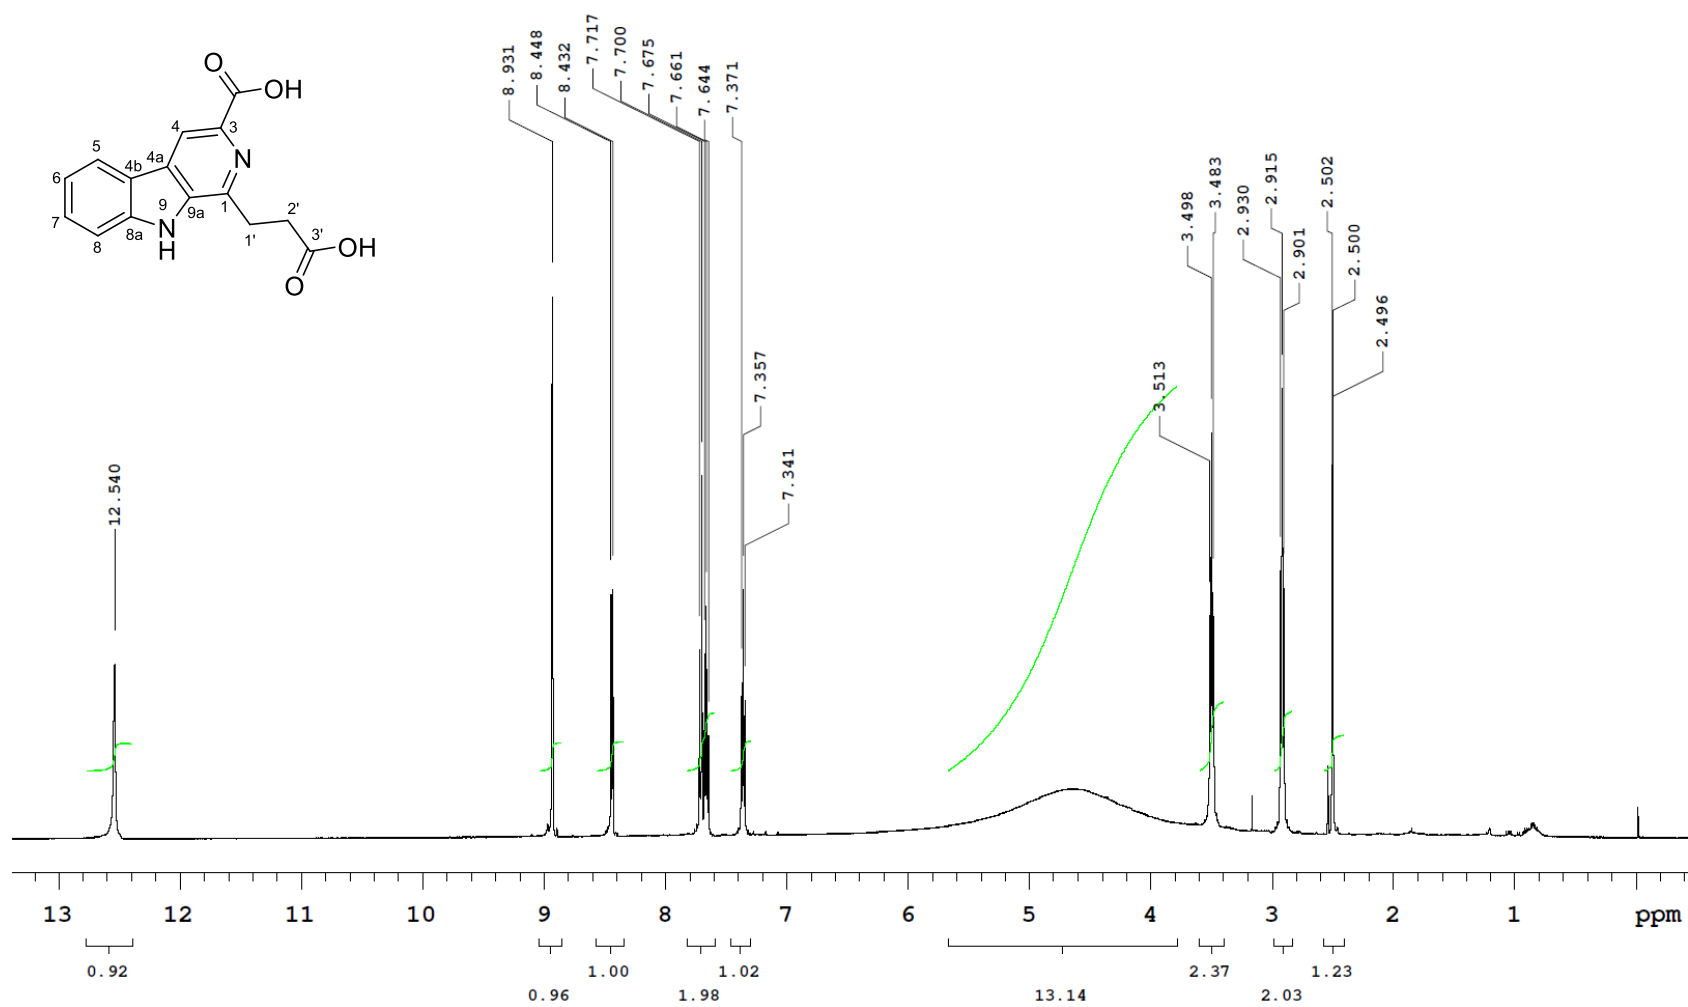

Figure S14: <sup>1</sup>H NMR spectrum (DMSO-d<sub>6</sub>, 500 MHz) of JBIR-133 (2)

Sample: Khaled\_A\_Shaaban  
File: xp  
Pulse Sequence: s2pul

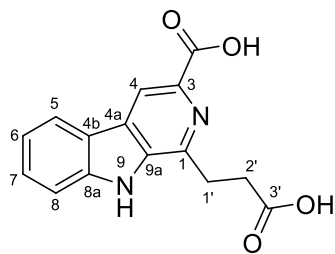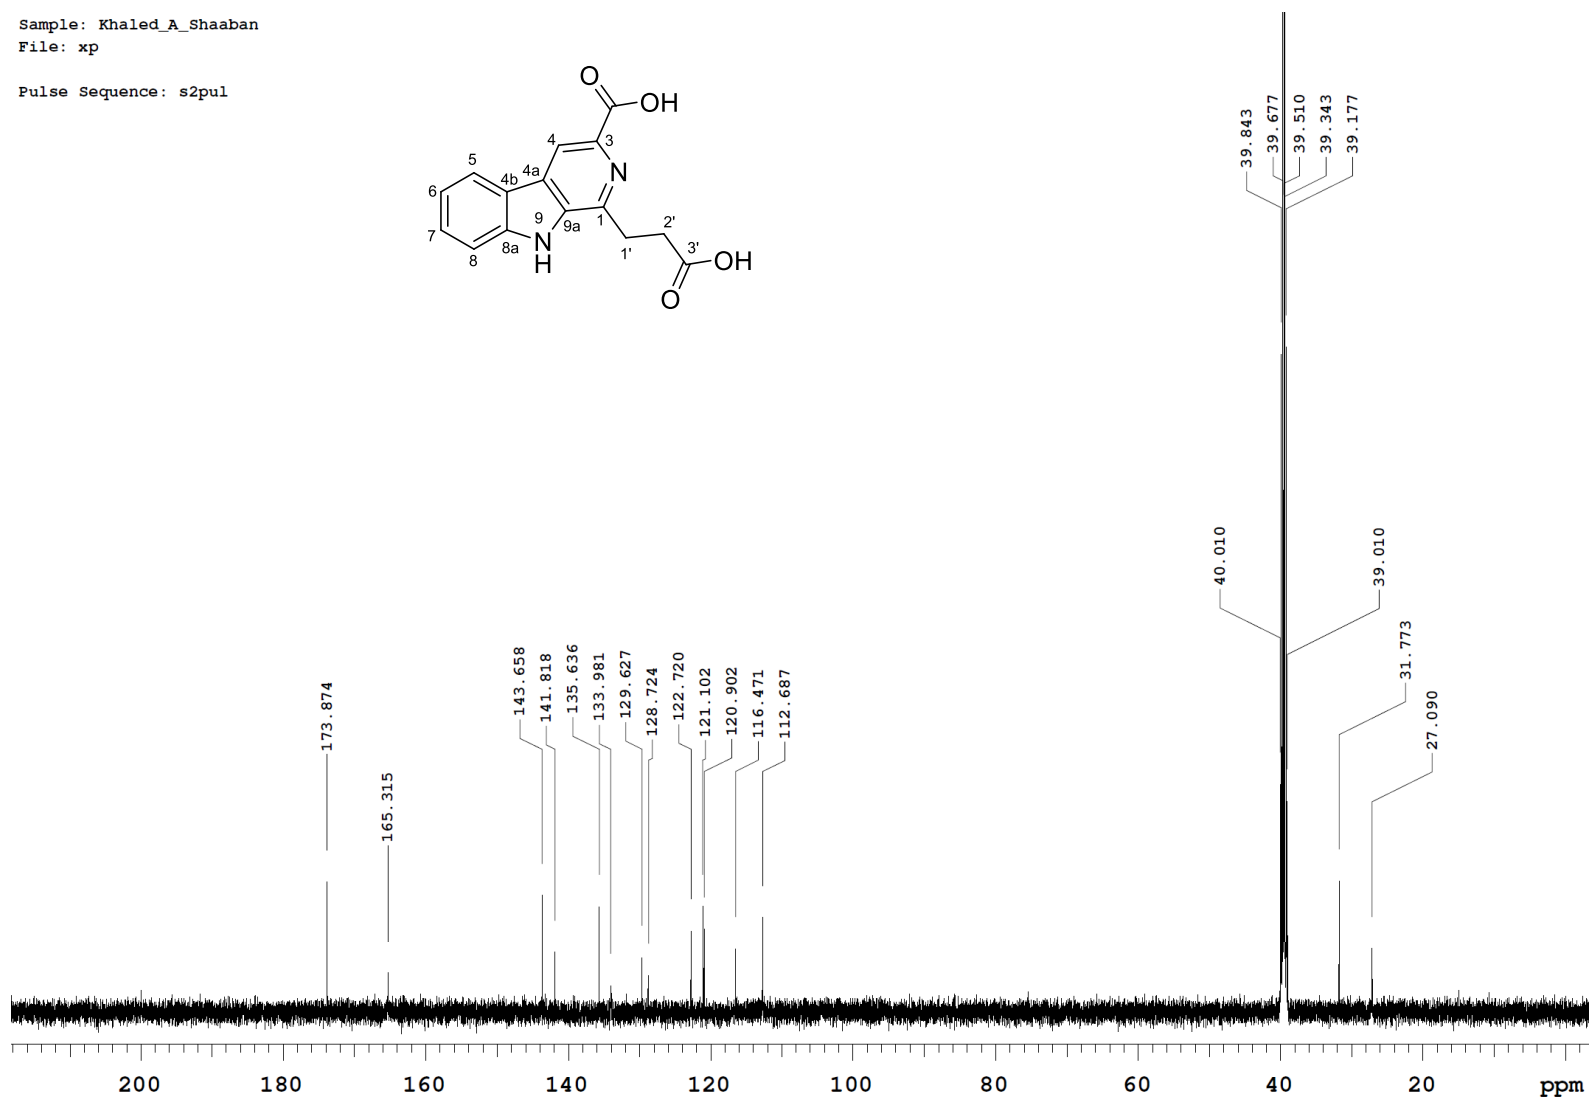

Figure S15: <sup>13</sup>C NMR spectrum (DMSO-*d*<sub>6</sub>, 125 MHz) of JBIR-133 (2)



KS\_259\_SG\_F10A\_gCOSY\_DMSO\_04\_23\_2014  
500 MHz, DMSO-d6, time=80 mins  
Khaled A. Shaaban

Sample: Khaled\_A\_Shaaban  
File: xp

Pulse Sequence: gCOSY

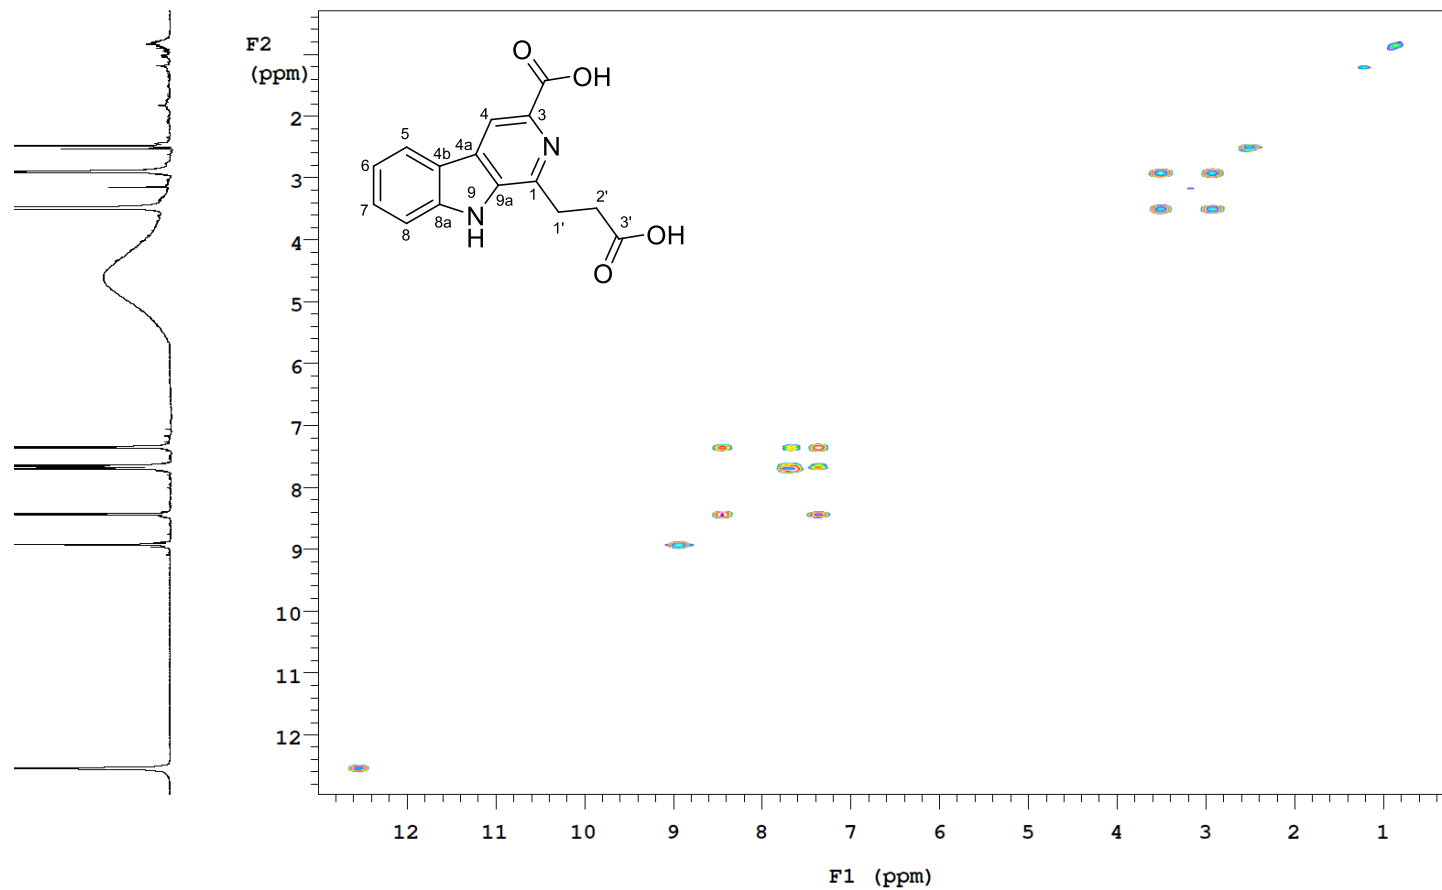

Figure S16:  $^1\text{H}$ - $^1\text{H}$  COSY spectrum (DMSO- $d_6$ , 500 MHz) of JBIR-133 (2)

Sample: Khaled\_A\_Shaaban

File: xp

Pulse Sequence: gHSQC

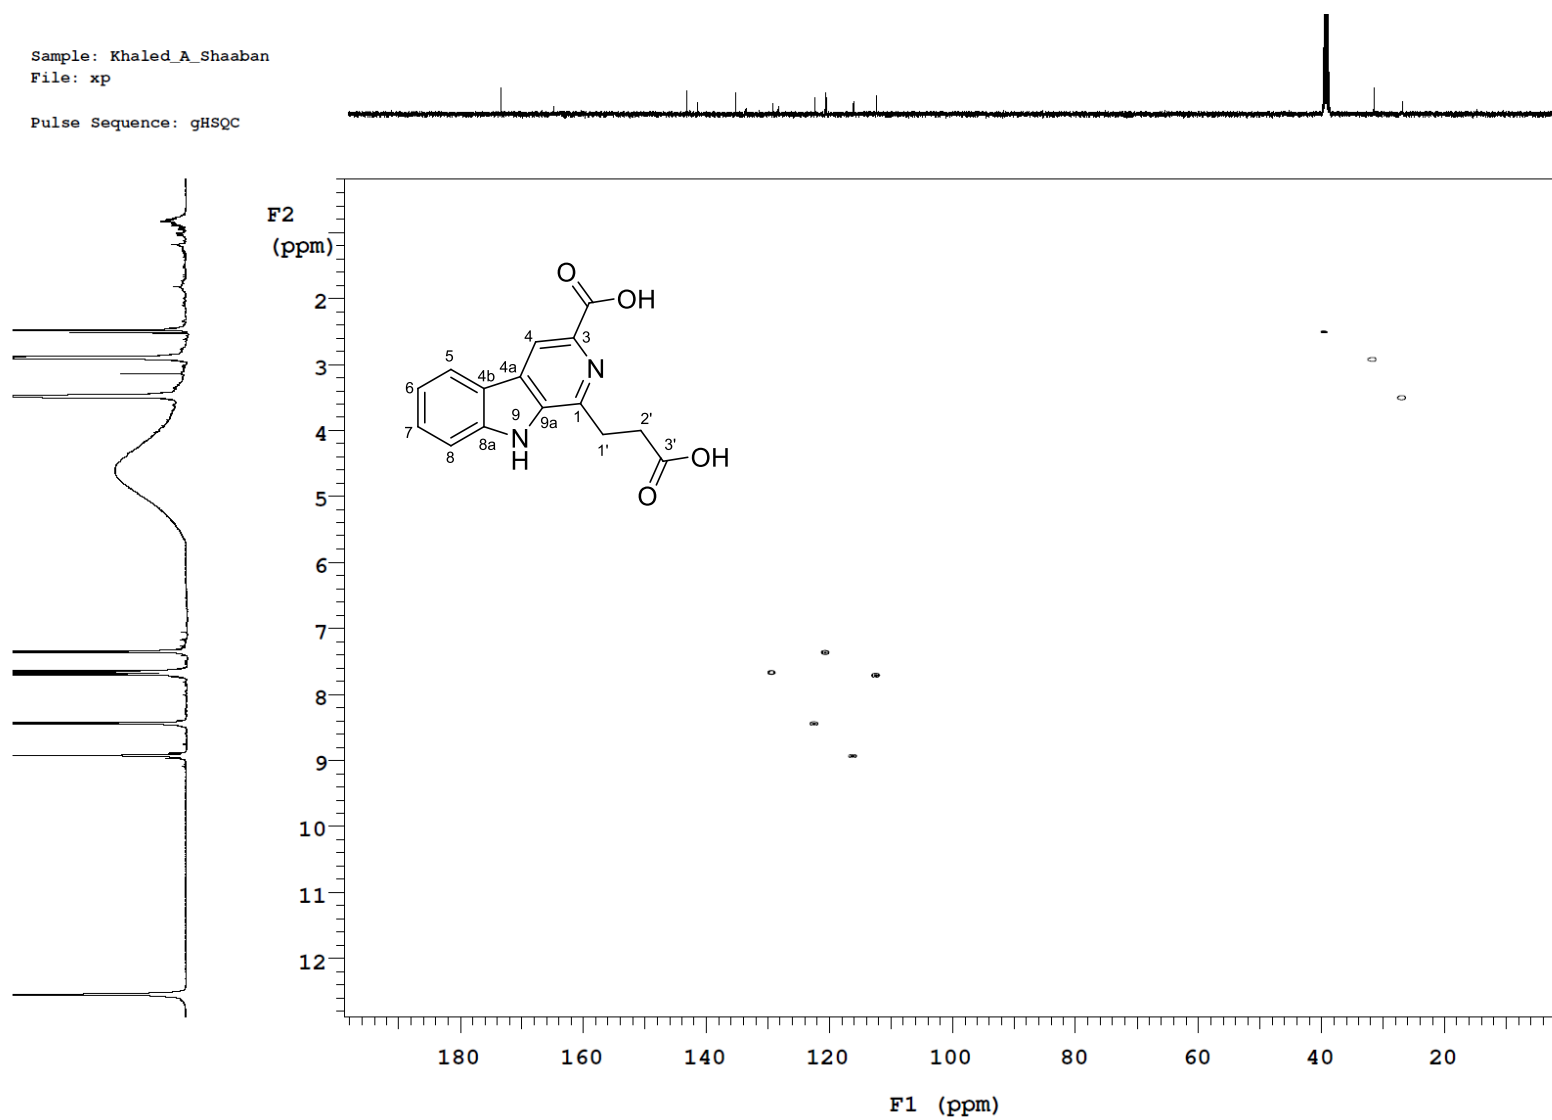

Figure S17: HSQC spectrum (DMSO-*d*<sub>6</sub>, 500 MHz) of JBIR-133 (2)

Sample: Khaled\_A\_Shaaban  
File: xp  
Pulse Sequence: gHMBC

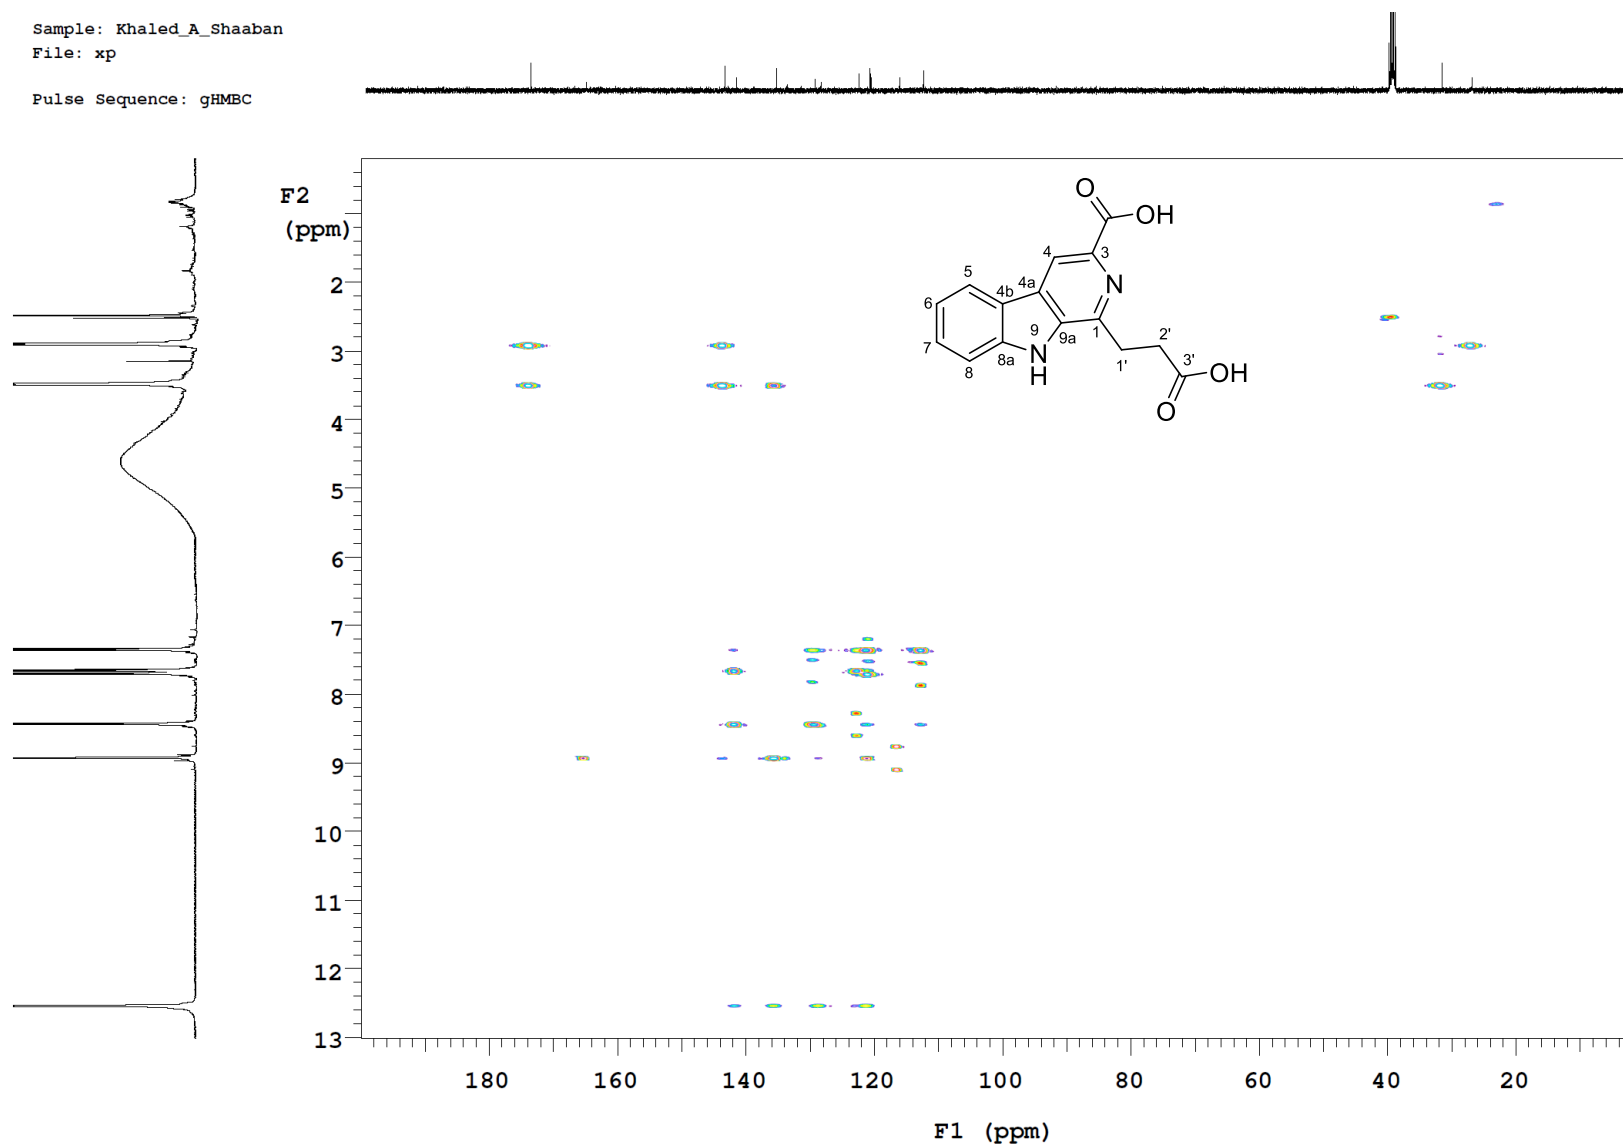

Figure S18: HMBC spectrum (DMSO- $d_6$ , 500 MHz) of JBIR-133 (2)

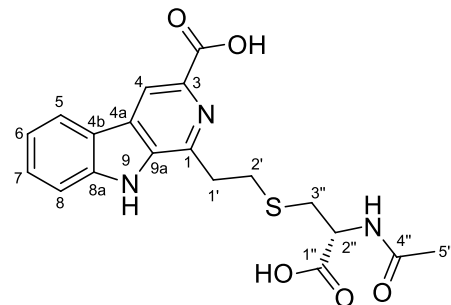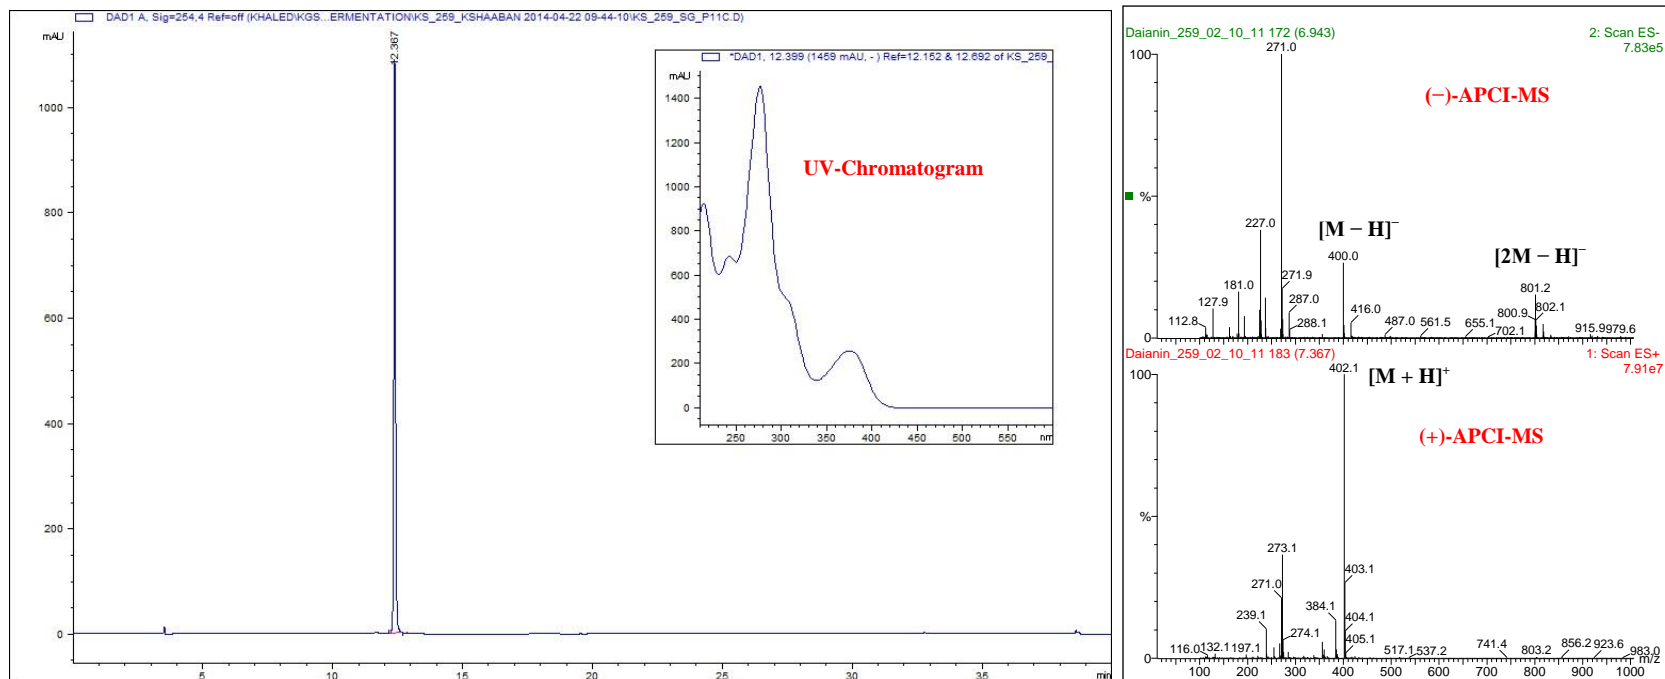

**Figure S19:** HPLC/UV/APCI-MS analyses of Kitasetaline (**3**). HPLC-conditions: Detection wavelength 254 nm; solvent A: H<sub>2</sub>O/0.1% Formic acid; solvent B: acetonitrile; flow rate: 1.0 mL min<sup>-1</sup>; 0-35 min, 95-0% A (linear gradient); 35-40 min 0-95% A (linear gradient).

Sample: Khaled\_A\_Shaaban

File: xp

Pulse Sequence: s2pul

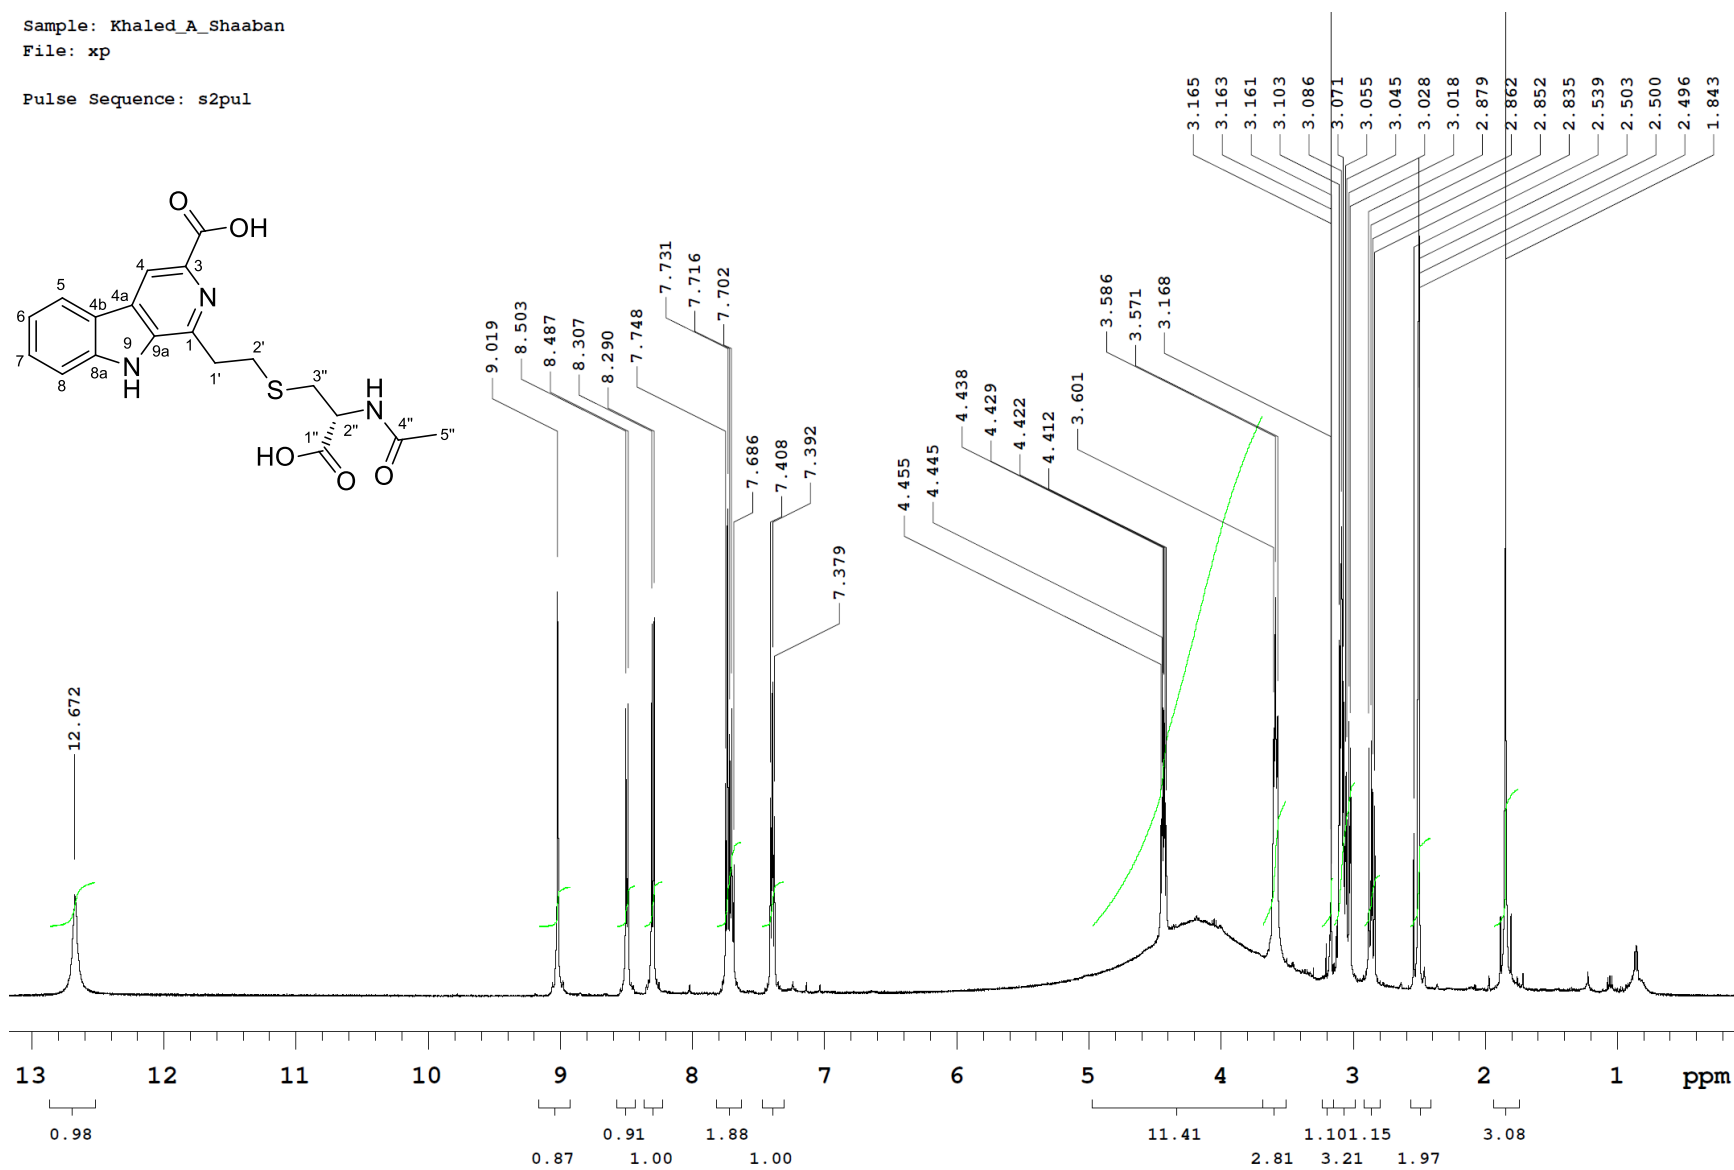

Figure S20: <sup>1</sup>H NMR spectrum (DMSO-*d*<sub>6</sub>, 500 MHz) of Kitasetaline (3)

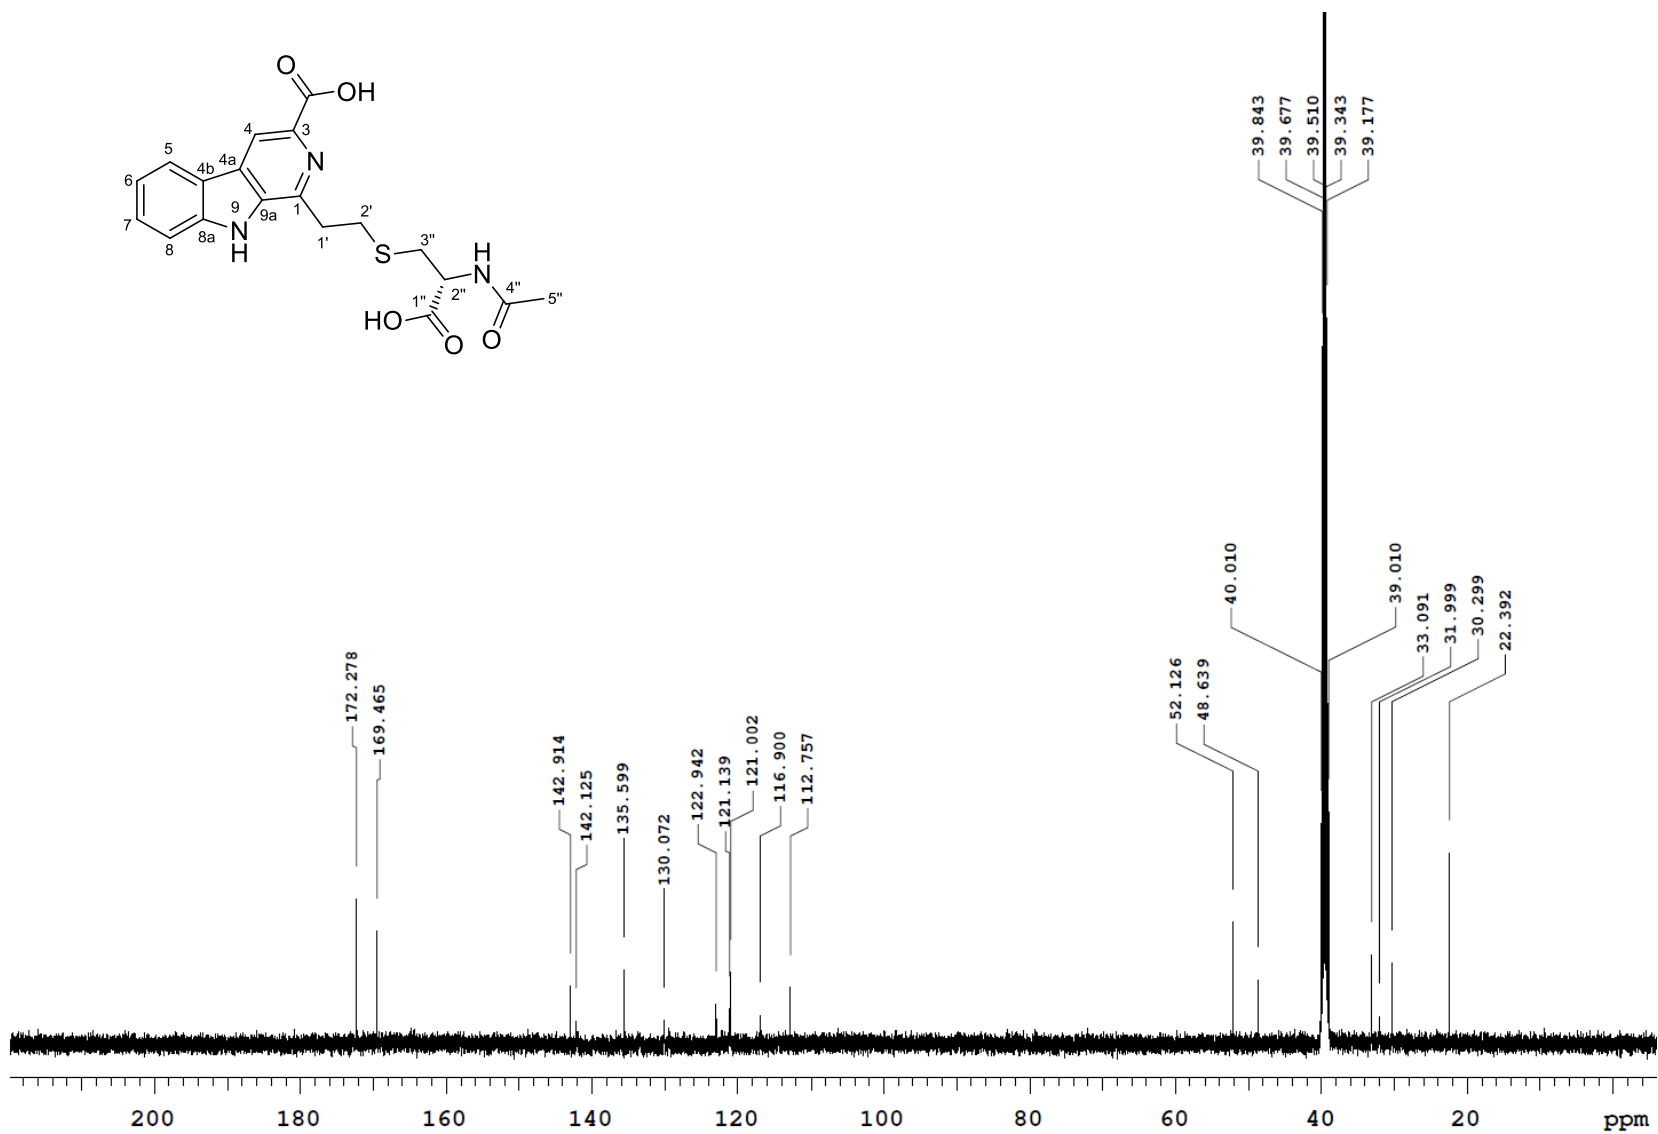

Figure S21:  $^{13}\text{C}$  NMR spectrum (DMSO- $d_6$ , 125 MHz) of Kitasetaline (3)

Sample: Khaled\_A\_Shaaban

File: xp

Pulse Sequence: gCOSY

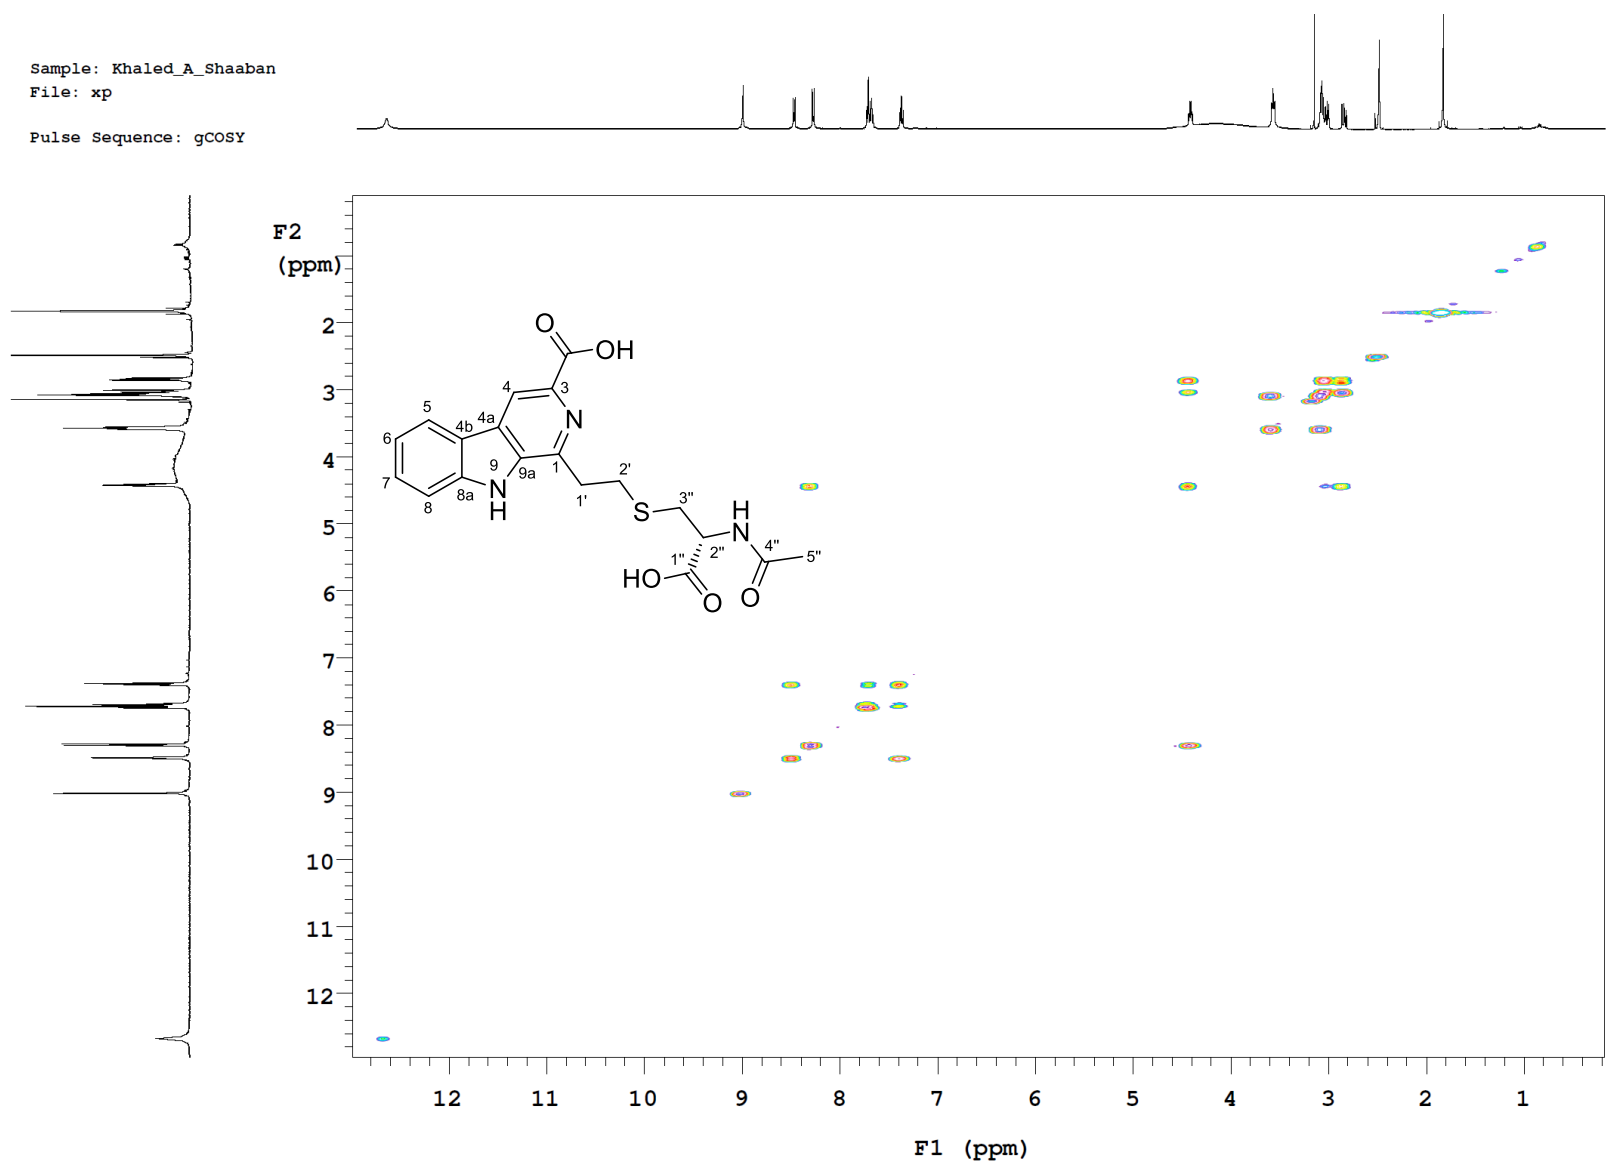

Figure S22:  $^1\text{H}$ - $^1\text{H}$  COSY spectrum (DMSO- $d_6$ , 500 MHz) of Kitasetaline (**3**)

Sample: Khaled\_A\_Shaaban

File: xp

Pulse Sequence: gHSQC

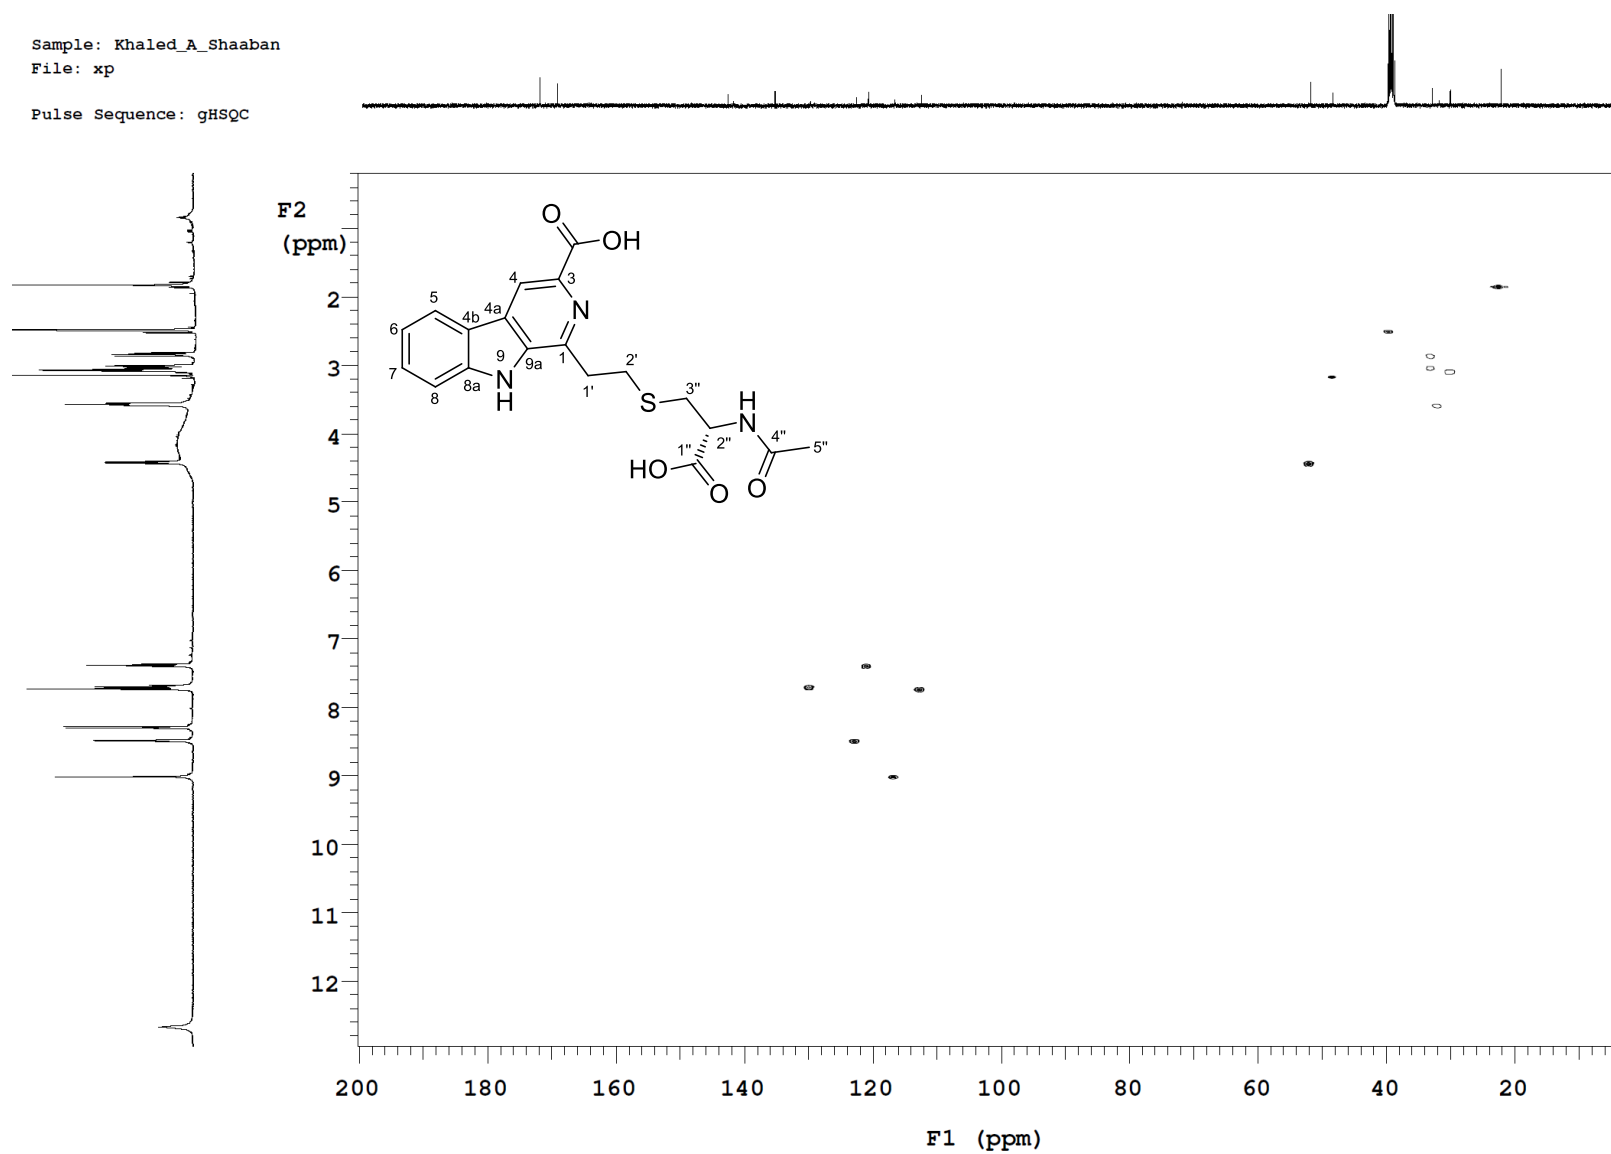

Figure S23: HSQC spectrum (DMSO-*d*<sub>6</sub>, 500 MHz) of Kitasetaline (3)



Sample: Khaled\_A\_Shaaban

File: xp

Pulse Sequence: gHMBC

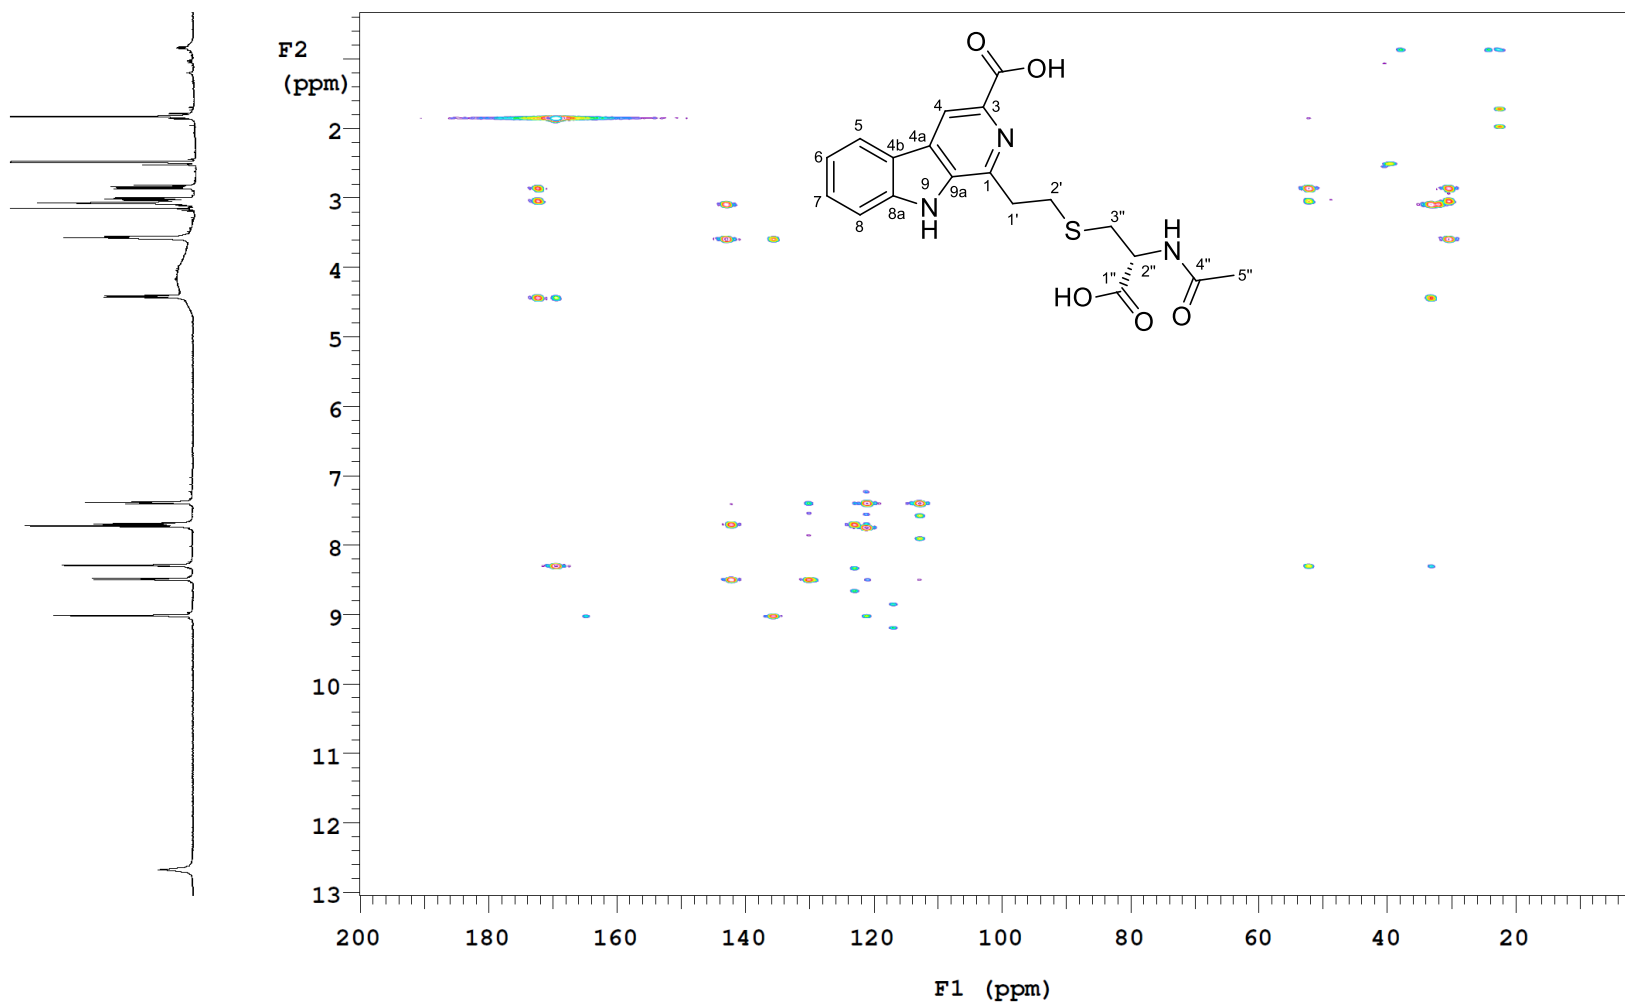

Figure S24: HMBC spectrum (DMSO- $d_6$ , 500 MHz) of Kitasetaline (3)

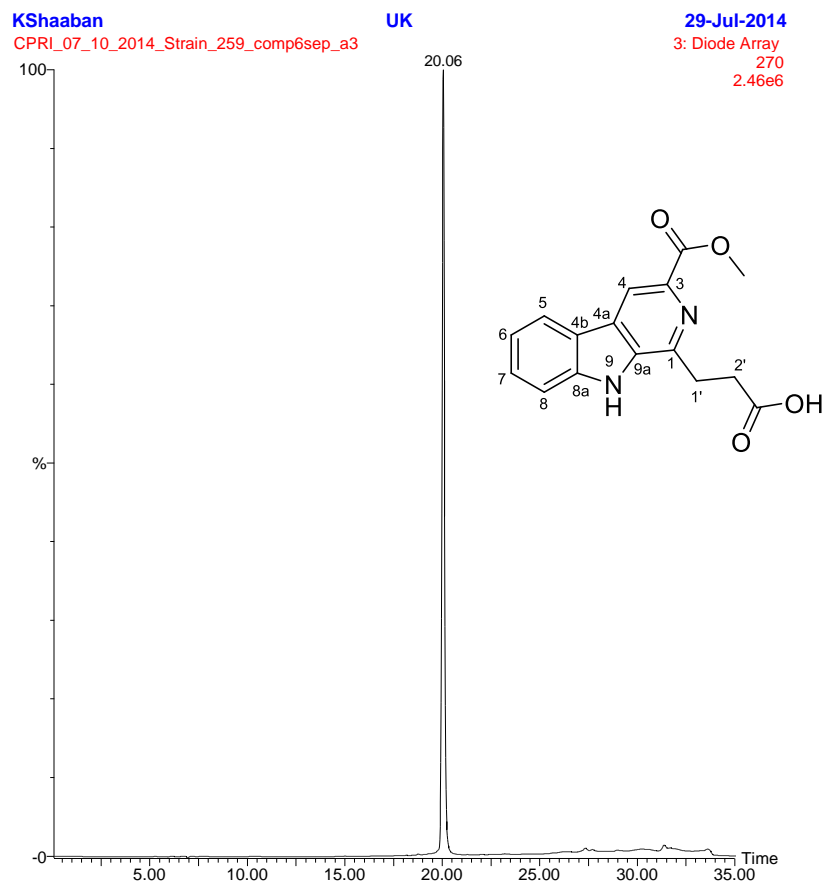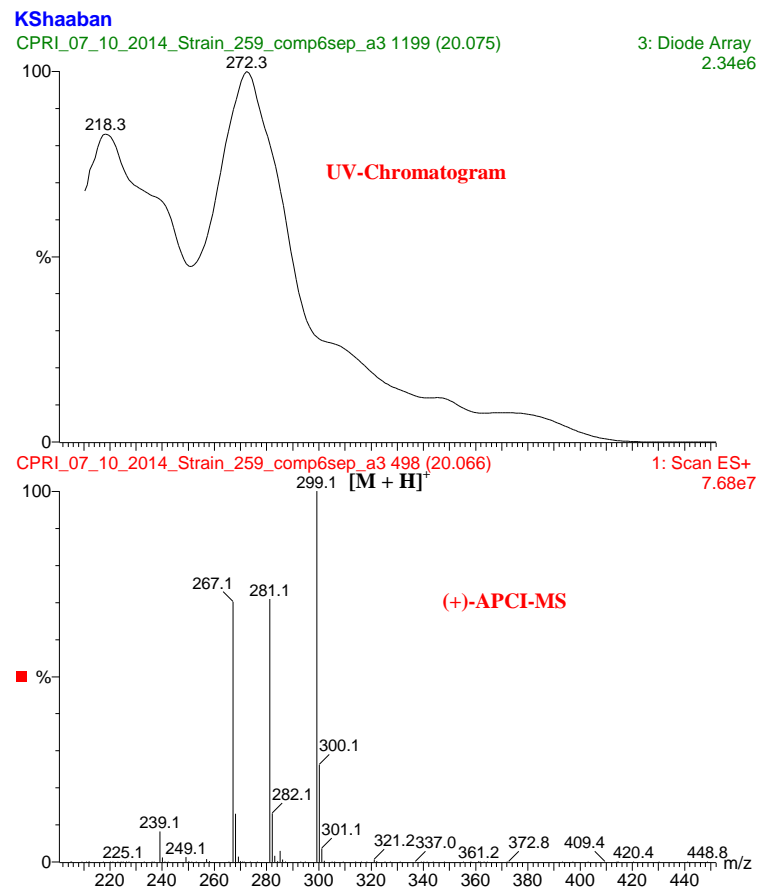

**Figure S25:** HPLC/UV/APCI-MS analyses of 1-(Propionic acid)- $\beta$ -carboline-3-carboxylic acid methyl ester (**4**). HPLC-conditions: Detection wavelength 270 nm; solvent A: H<sub>2</sub>O/0.1% Formic acid; solvent B: acetonitrile; flow rate: 0.5 mL min<sup>-1</sup>; 0-4 min, 90% A; 4-22 min, 90-0% A (linear gradient); 22-27 min 0% A; 27-35 min 0-90% A (linear gradient).

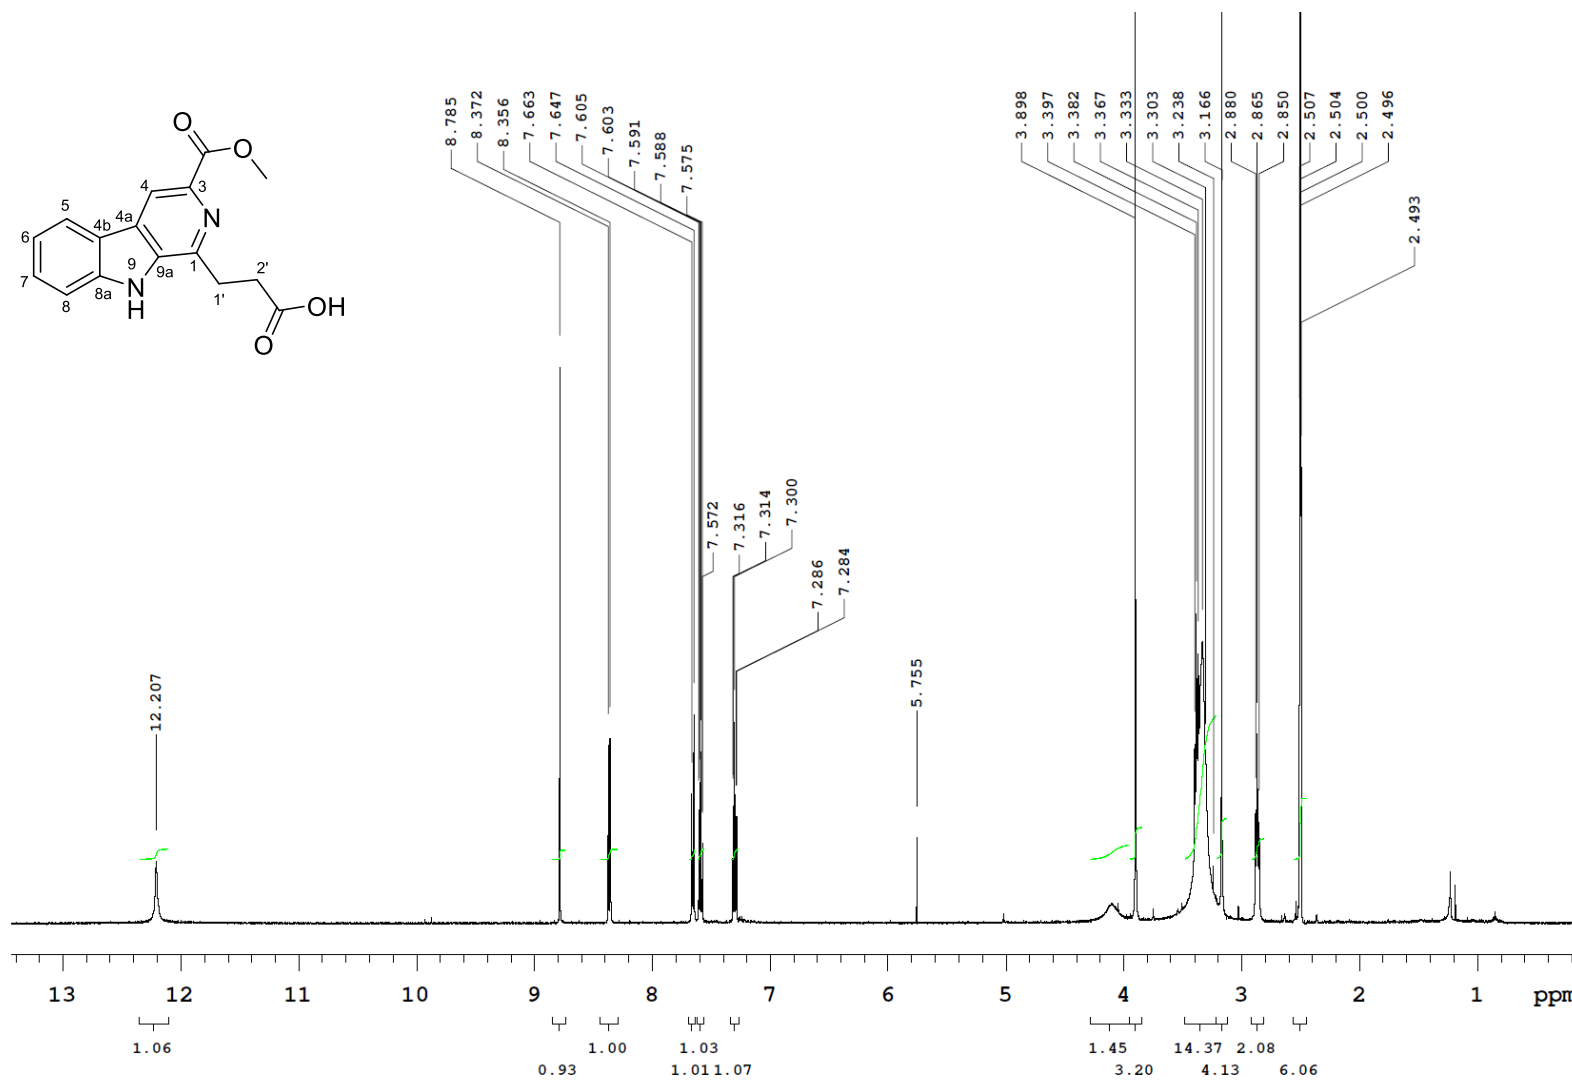

Figure S26: <sup>1</sup>H NMR spectrum (DMSO-*d*<sub>6</sub>, 500 MHz) of 1-(Propionic acid)-β-carboline-3-carboxylic acid methyl ester (4)

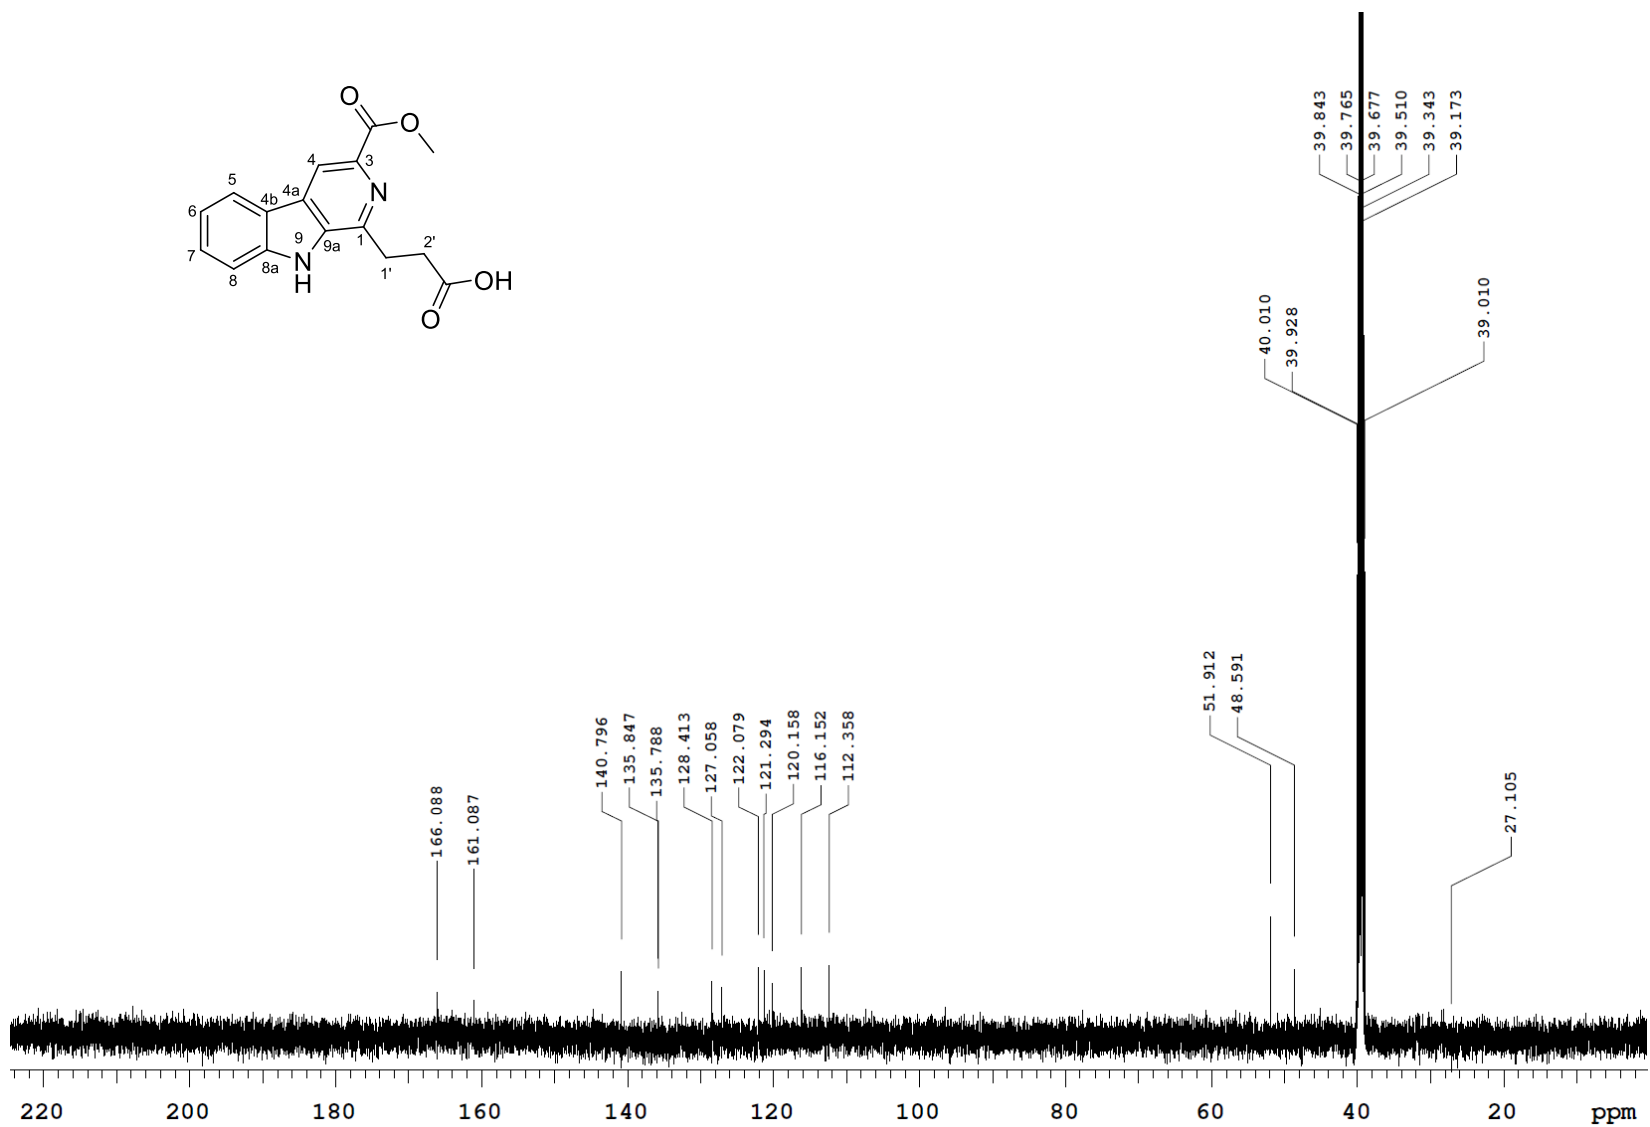

Figure S27: <sup>13</sup>C NMR spectrum (DMSO-d<sub>6</sub>, 125 MHz) of 1-(Propionic acid)-β-carboline-3-carboxylic acid methyl ester (4)

KS\_259\_6A3\_gCOSY\_DMSO\_08\_12\_2014  
500 MHz, DMSO-d6, 80 min  
Khaled A. Shaaban  
Sample: khaled\_A\_Shaaban  
File: xp  
Pulse Sequence: gCOSY

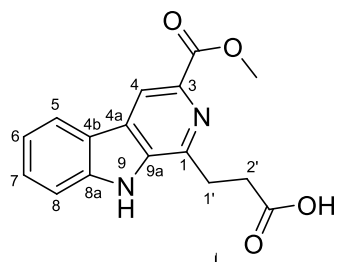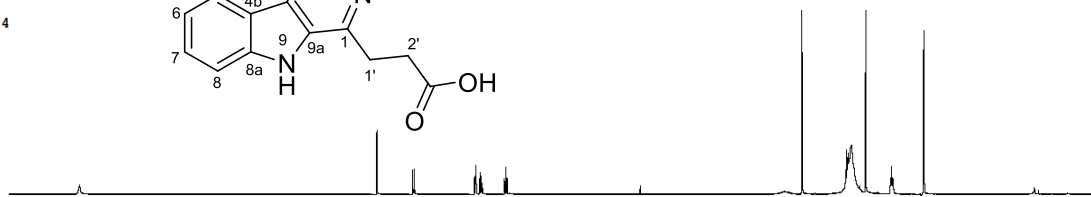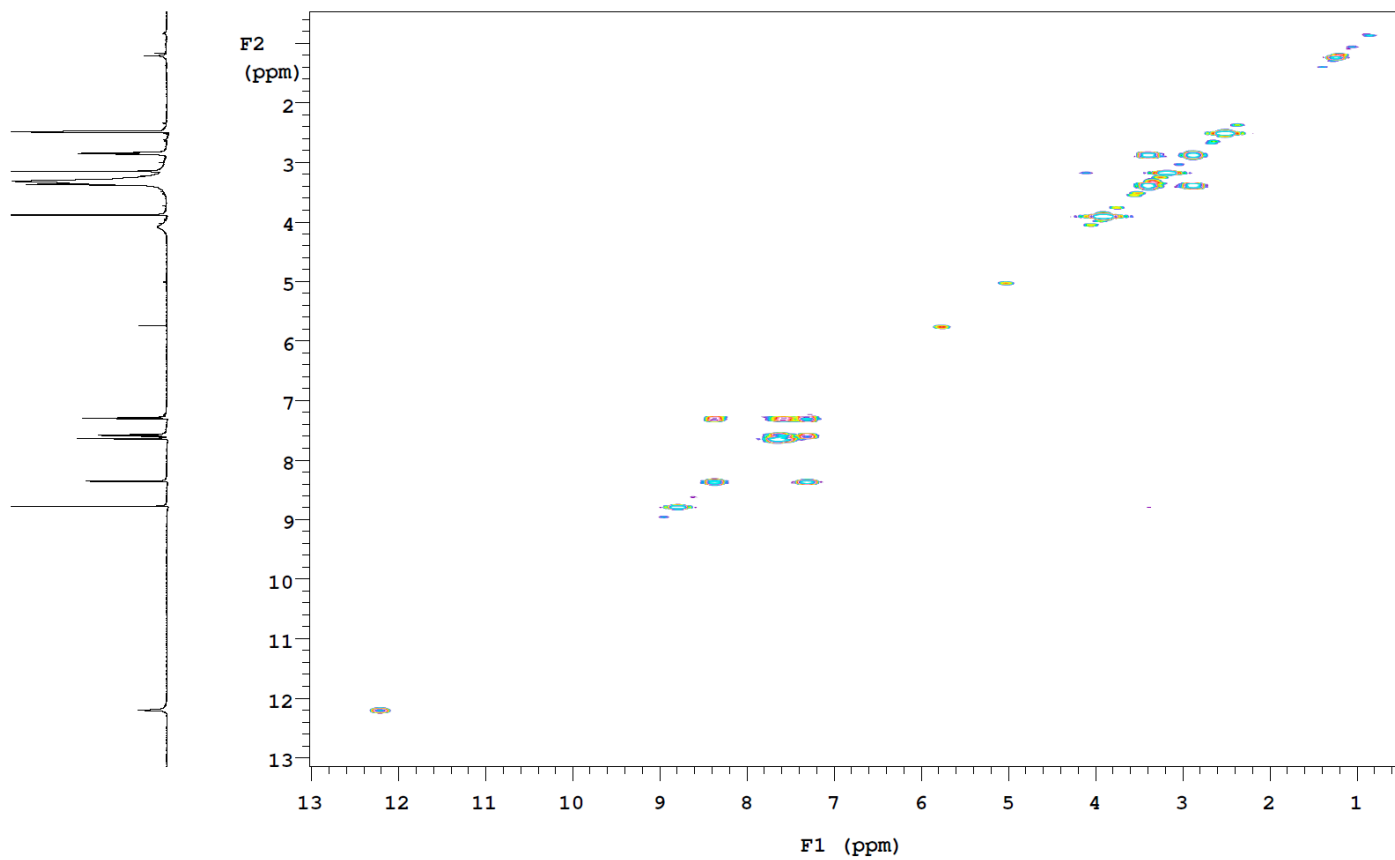

Figure S28:  $^1\text{H}$ - $^1\text{H}$  COSY spectrum (DMSO- $d_6$ , 500 MHz) of 1-(Propionic acid)- $\beta$ -carboline-3-carboxylic acid methyl ester (4)

Sample: khaled\_A\_Shaaban  
File: xp  
Pulse Sequence: gHSQC

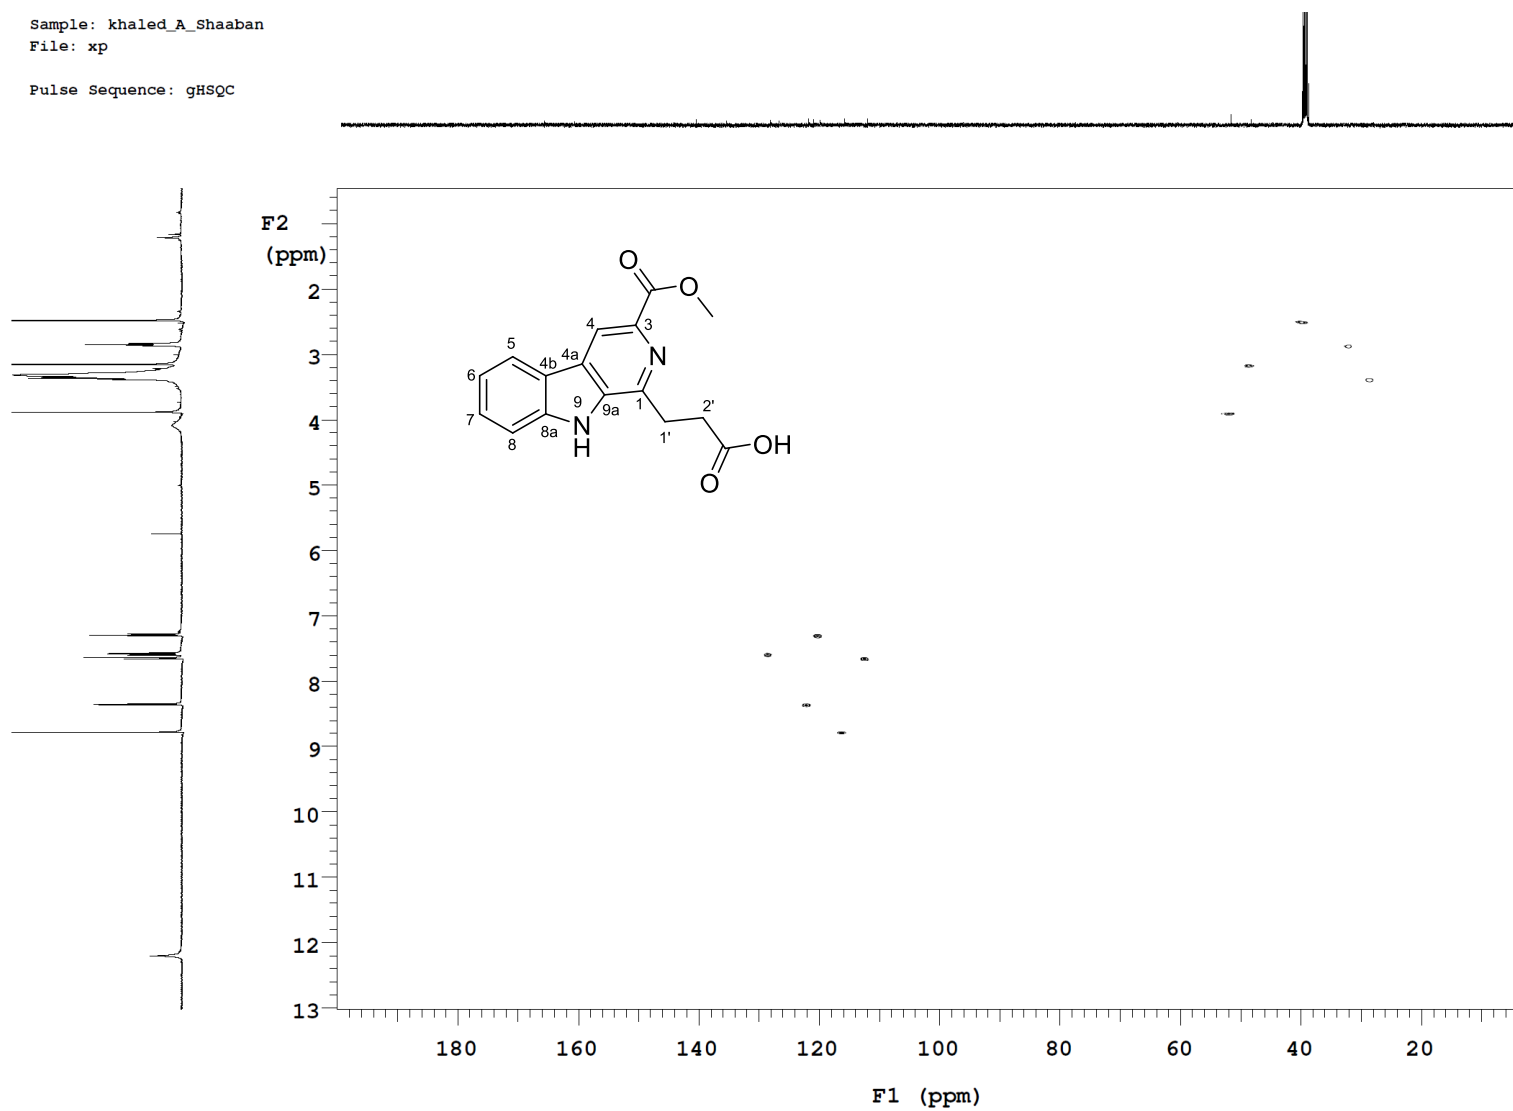

**Figure S29:** HSQC spectrum (DMSO-*d*<sub>6</sub>, 500 MHz) of 1-(Propionic acid)-β-carboline-3-carboxylic acid methyl ester (**4**)

Sample: khaled\_A\_Shaaban  
File: xp  
Pulse Sequence: gHMBC

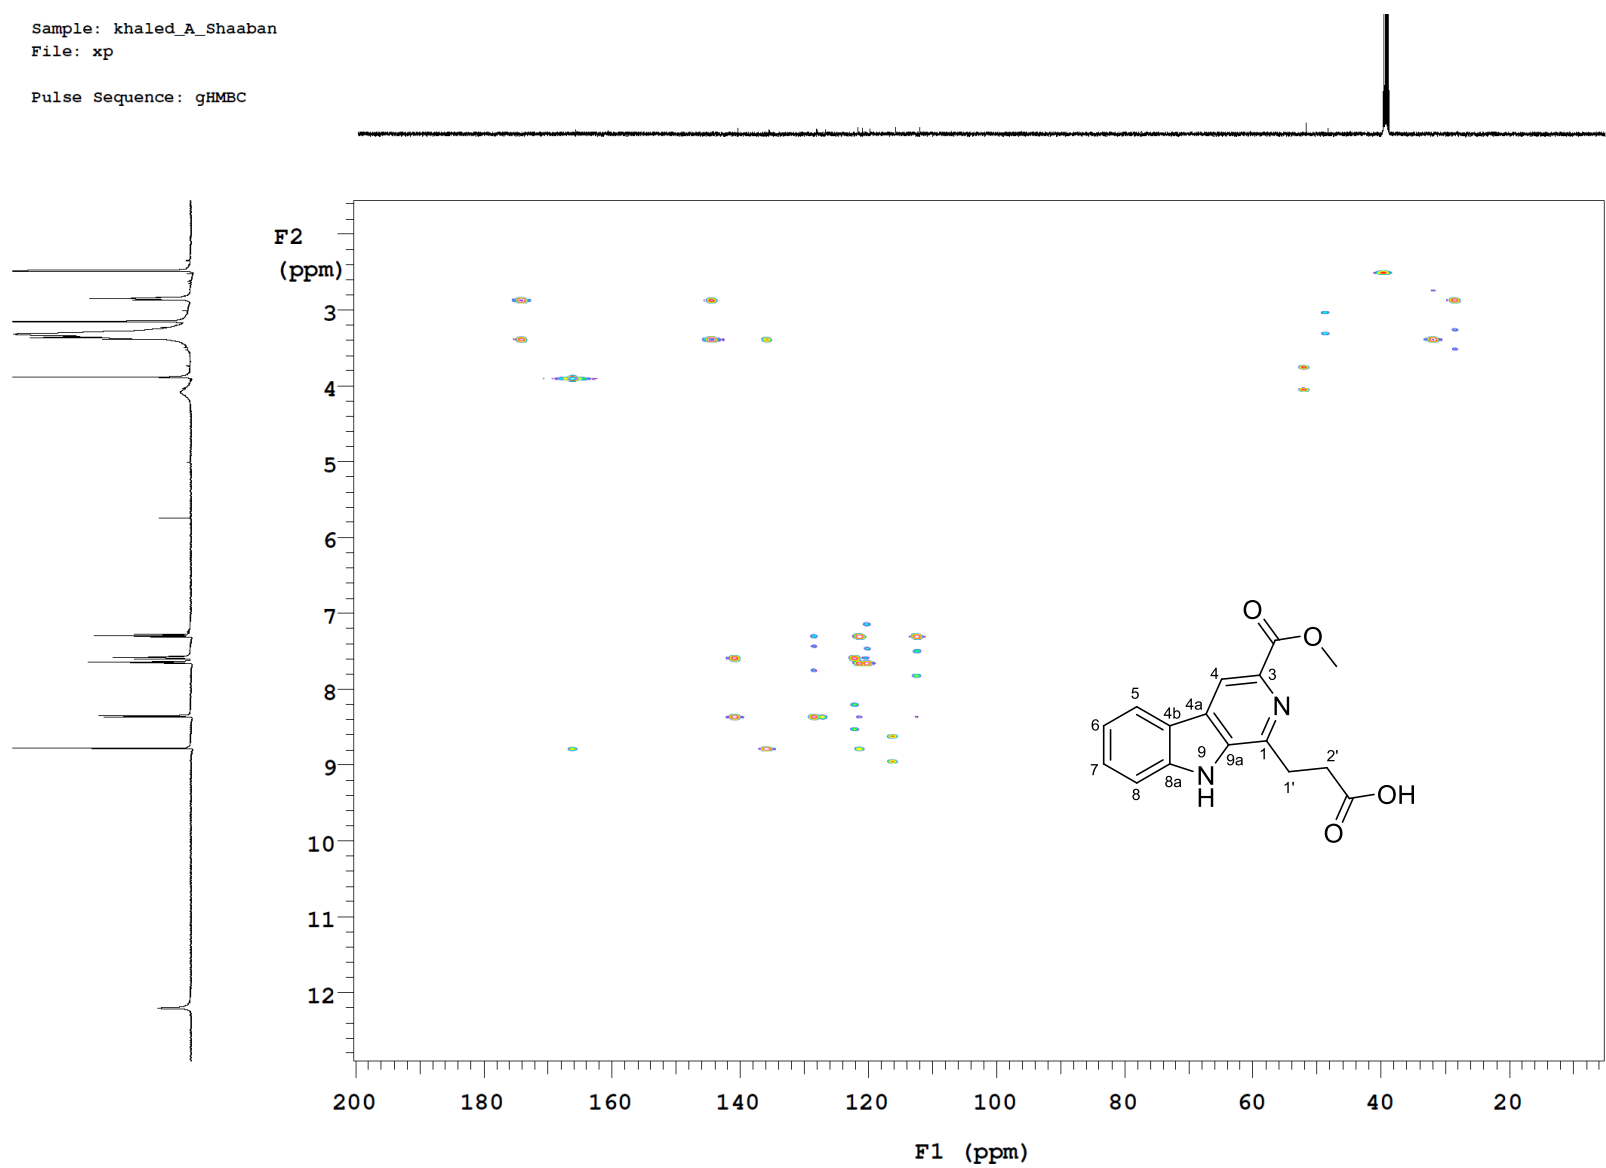

Figure S30: HMBC spectrum (DMSO-*d*<sub>6</sub>, 500 MHz) of 1-(Propionic acid)-β-carboline-3-carboxylic acid methyl ester (4)

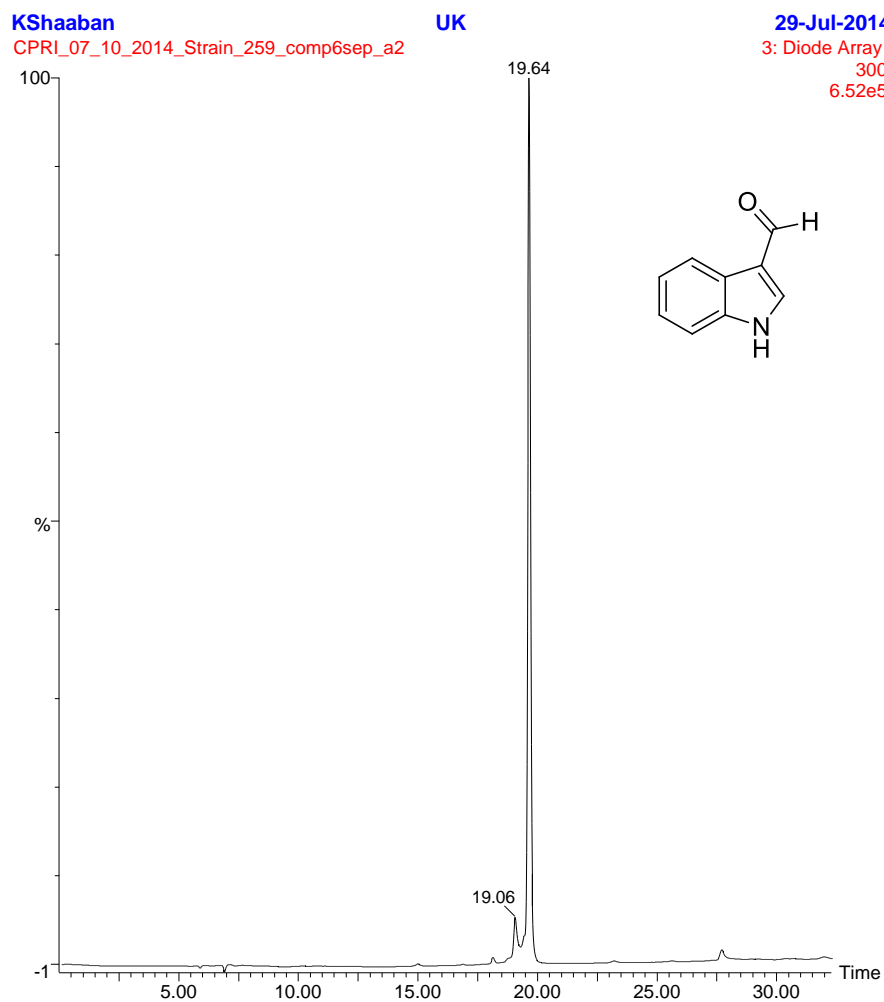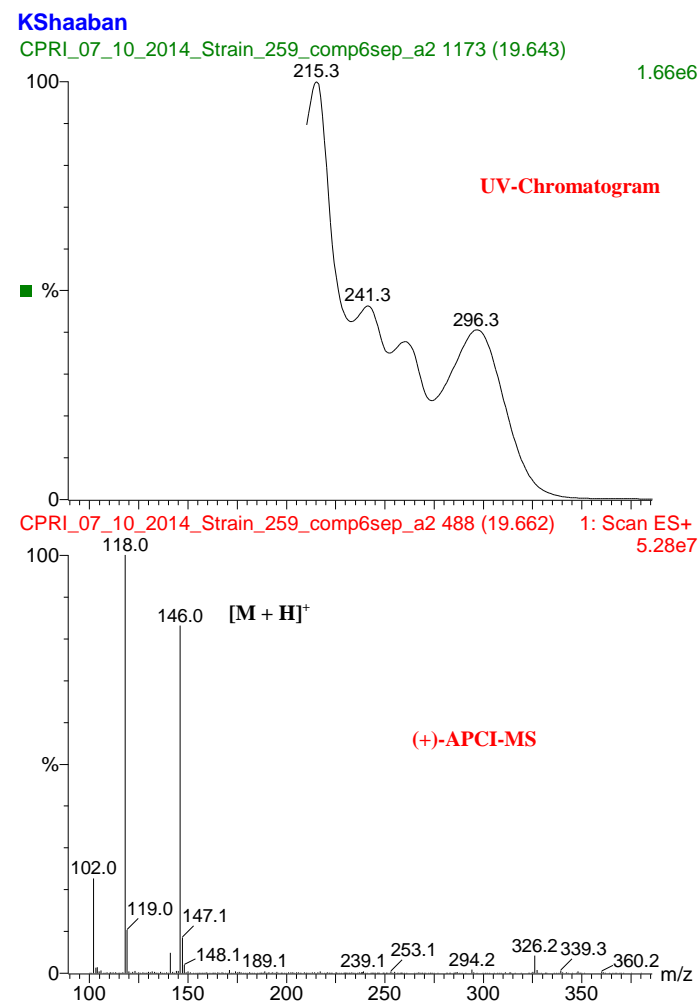

**Figure S31:** HPLC/UV/APCI-MS analyses of Indole-3-carbaldehyde (**5**). HPLC-conditions: Detection wavelength 270 nm; solvent A: H<sub>2</sub>O/0.1% Formic acid; solvent B: acetonitrile; flow rate: 0.5 mL min<sup>-1</sup>; 0-4 min, 90% A; 4-22 min, 90-0% A (linear gradient); 22-27 min 0% A; 27-35 min 0-90% A (linear gradient).



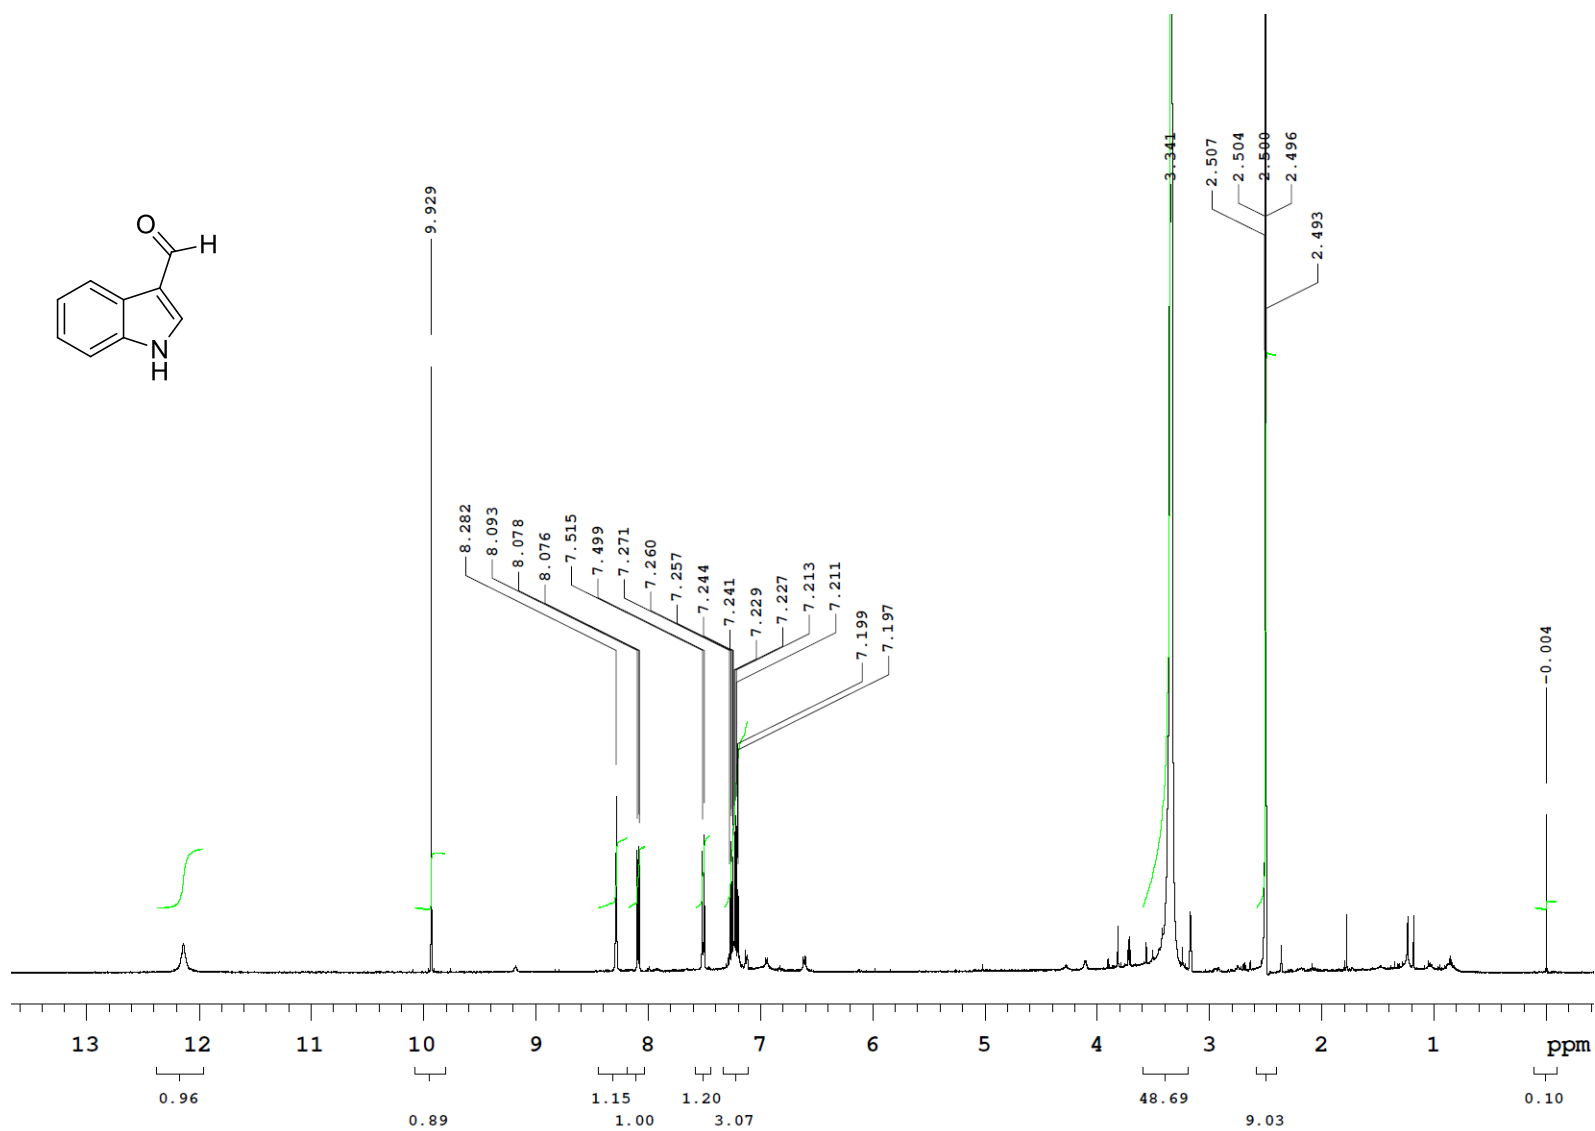

Figure S32: <sup>1</sup>H NMR spectrum (DMSO-*d*<sub>6</sub>, 500 MHz) of Indole-3-carbaldehyde (5)

Pulse Sequence: gHSQC

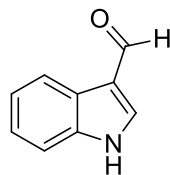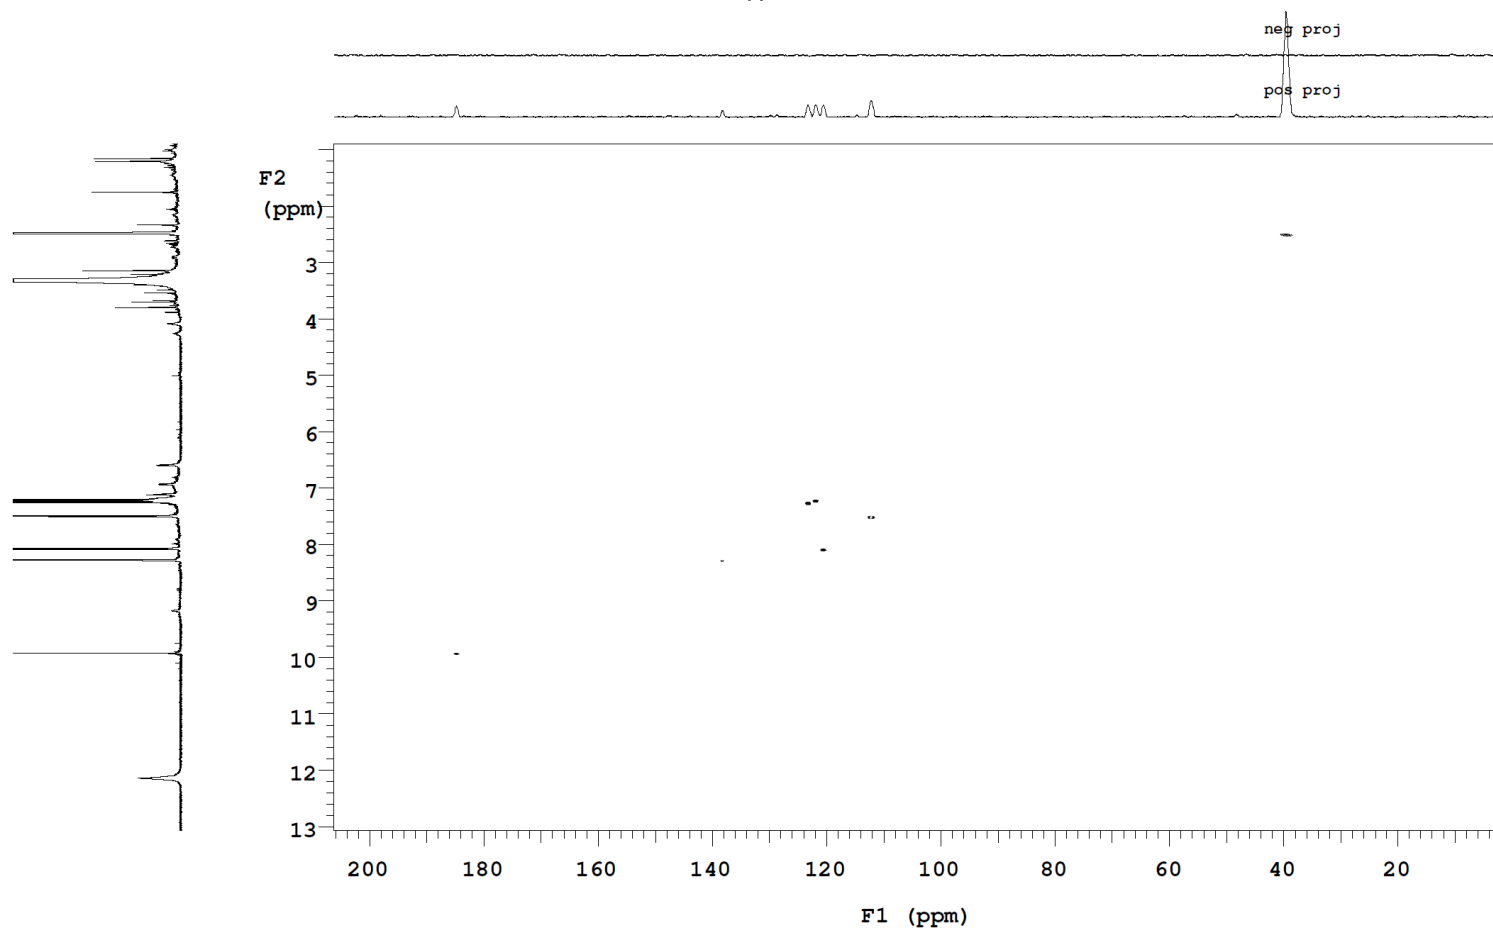

Figure S33: HSQC spectrum (DMSO- $d_6$ , 500 MHz) of Indole-3-carbaldehyde (5)

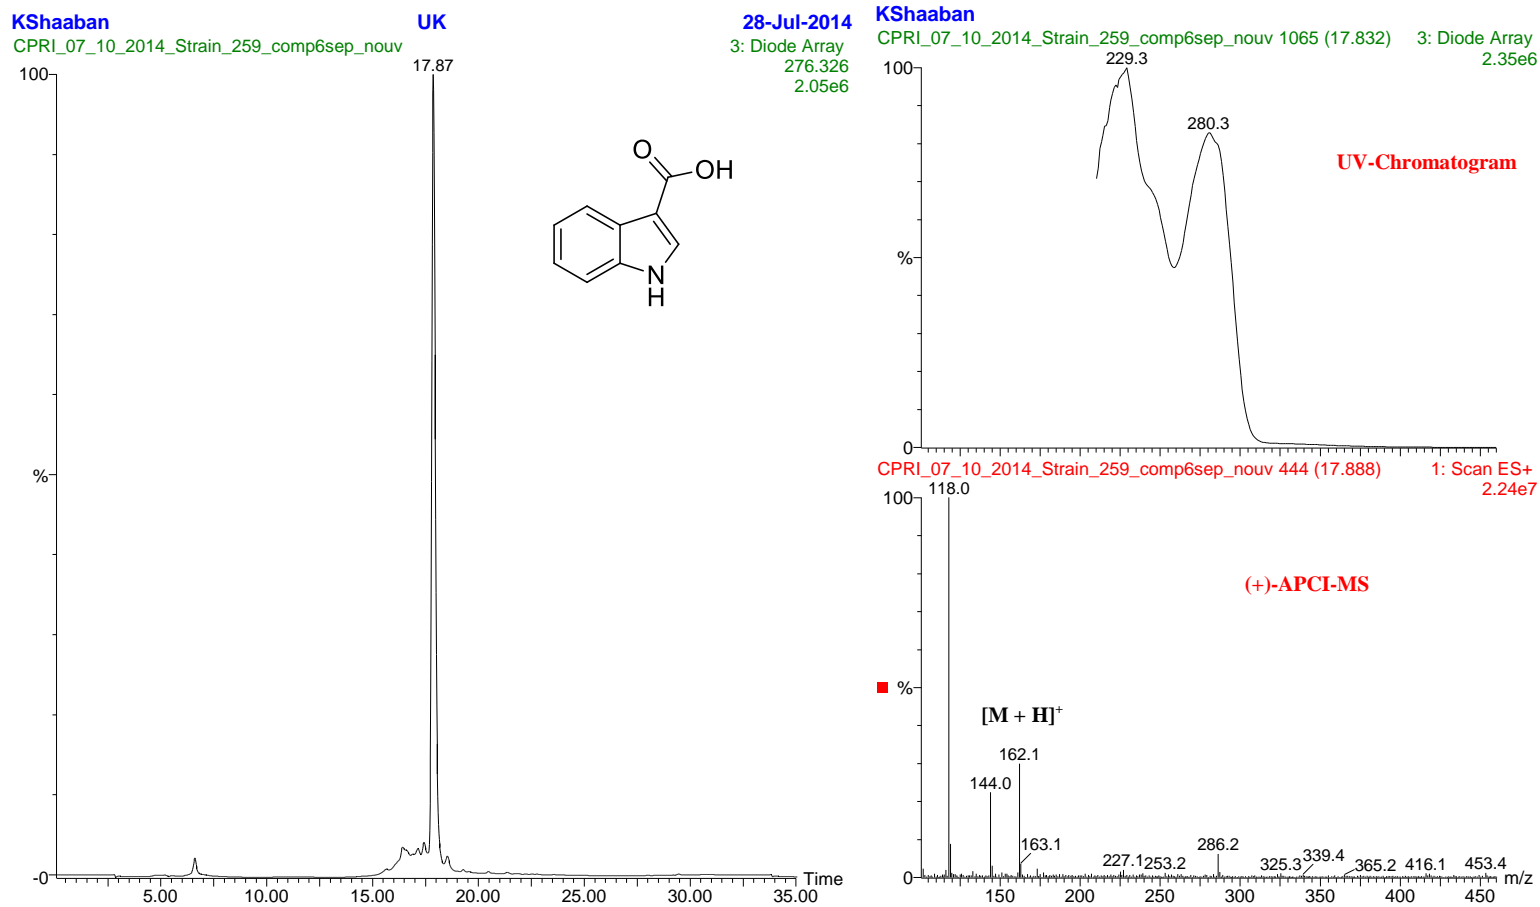

**Figure S34:** HPLC/UV/APCI-MS analyses of Indole-3-carboxylic acid (**6**). HPLC-conditions: Detection wavelength 270 nm; solvent A: H<sub>2</sub>O/0.1% Formic acid; solvent B: acetonitrile; flow rate: 0.5 mL min<sup>-1</sup>; 0-4 min, 90% A; 4-22 min, 90-0% A (linear gradient); 22-27 min 0% A; 27-35 min 0-90% A (linear gradient).

Sample: khaled\_A\_Shaaban

File: xp

Pulse Sequence: s2pul

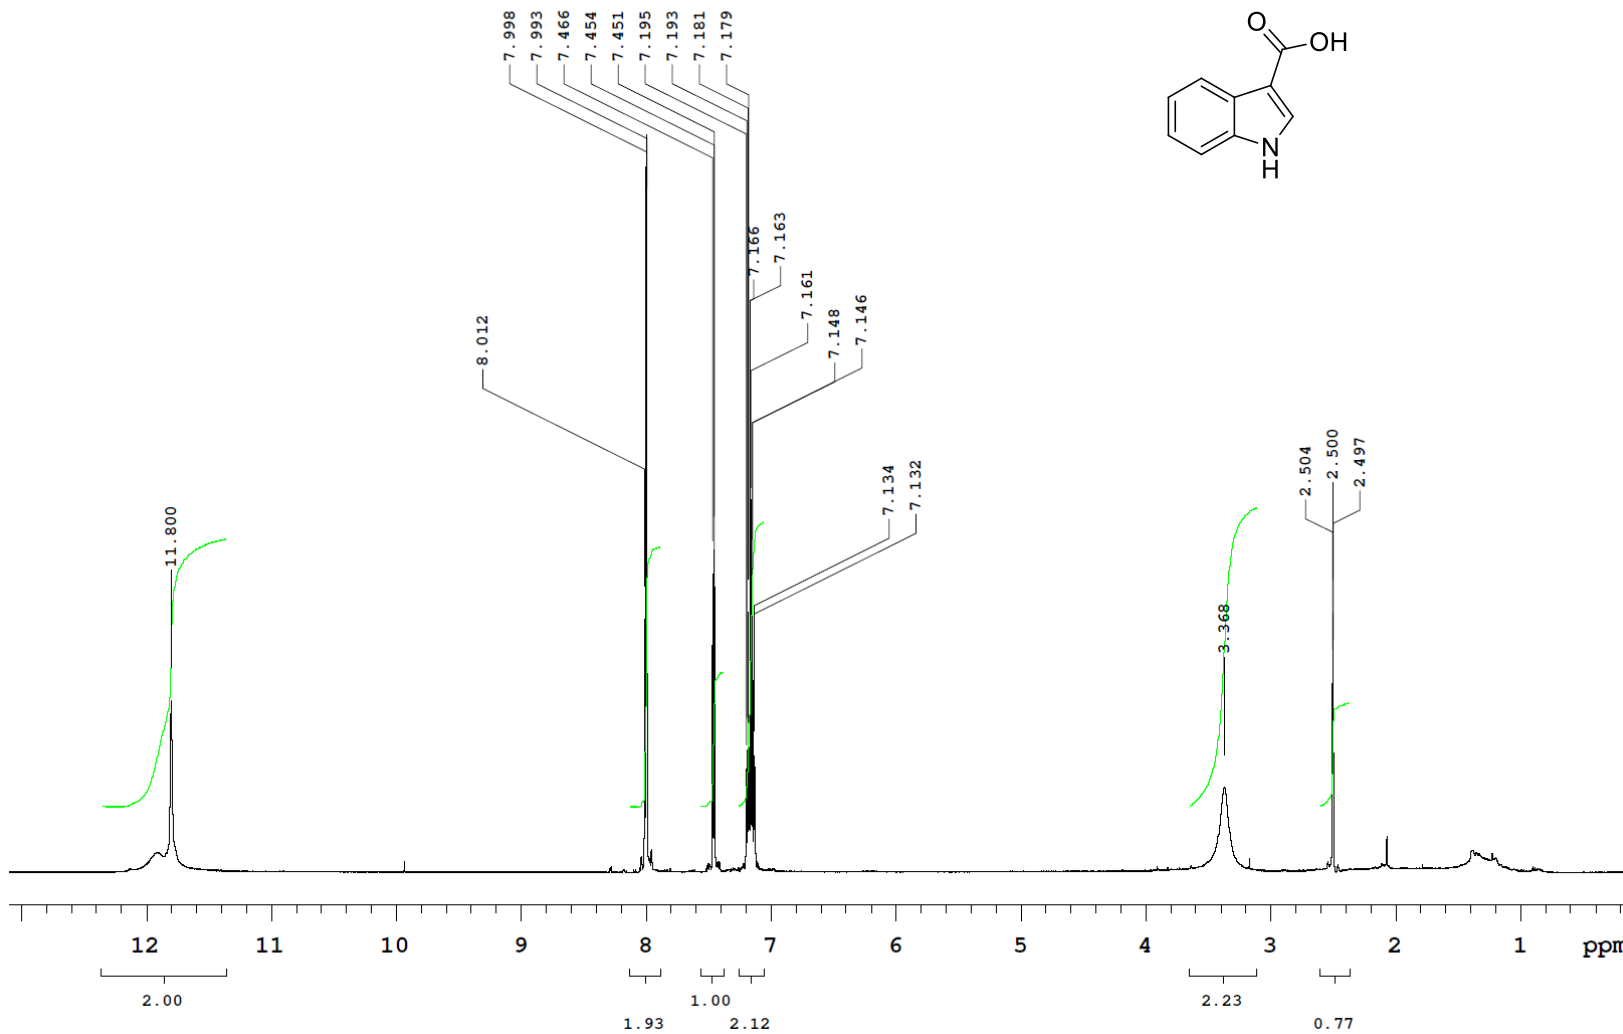

Figure S35:  $^1\text{H}$  NMR spectrum ( $\text{DMSO-}d_6$ , 500 MHz) of Indole-3-carboxylic acid (6)

Sample: khaled\_A\_Shaaban

File: xp

Pulse Sequence: s2pul

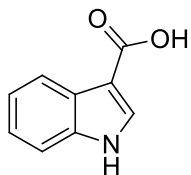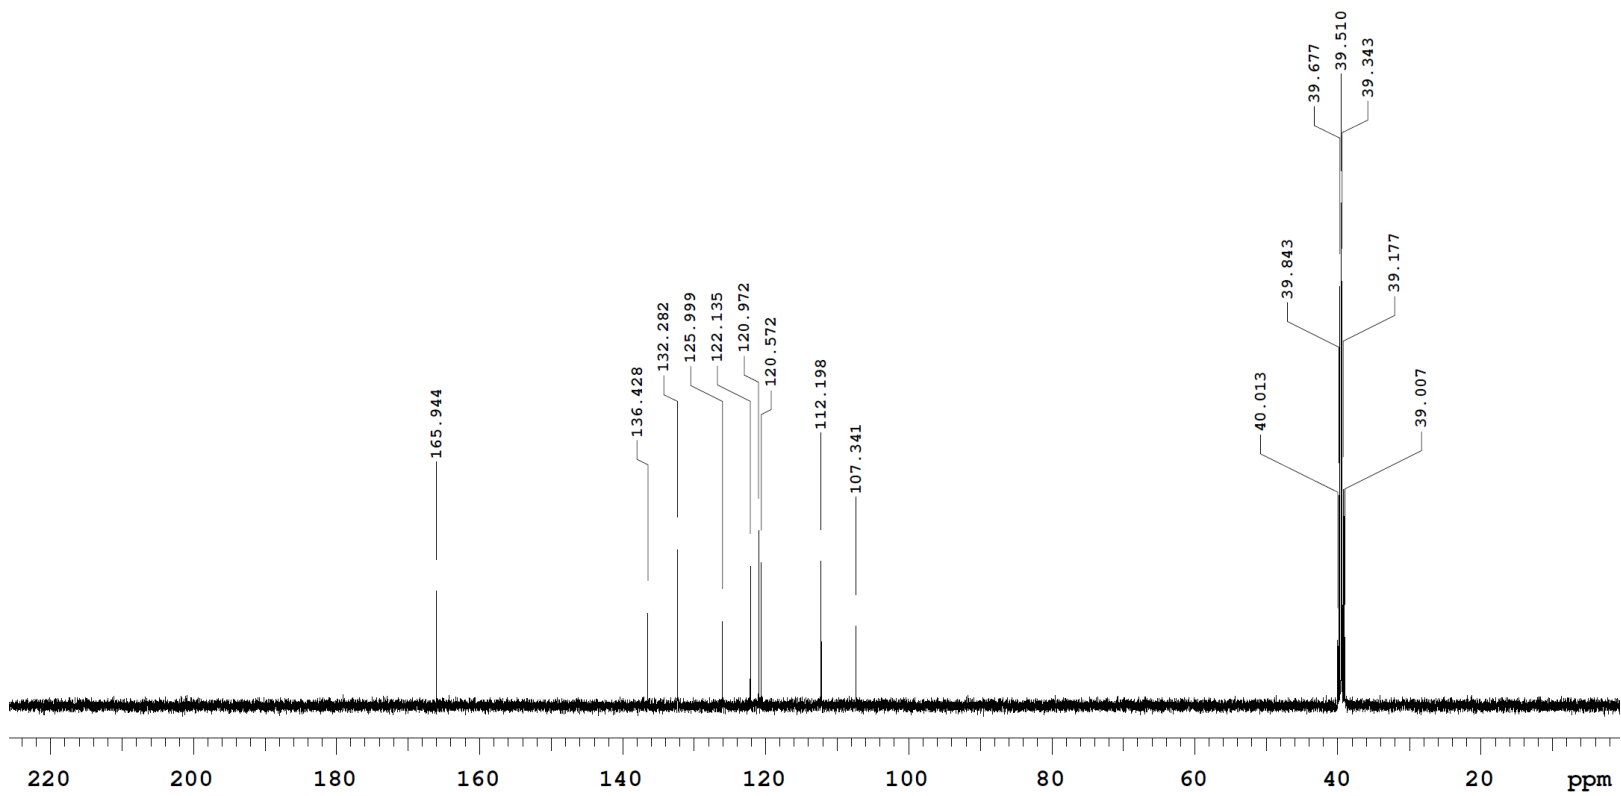

Figure S36: <sup>13</sup>C NMR spectrum (DMSO-*d*<sub>6</sub>, 125 MHz) of Indole-3-carboxylic acid (**6**)

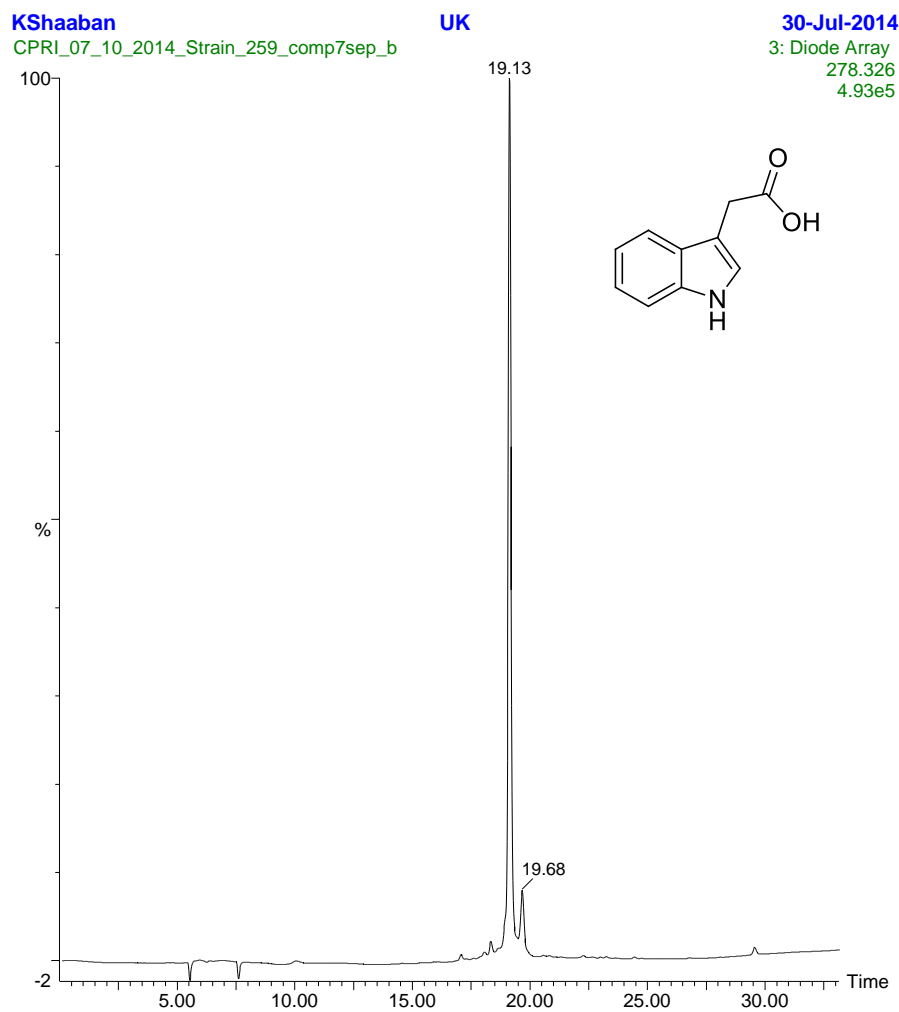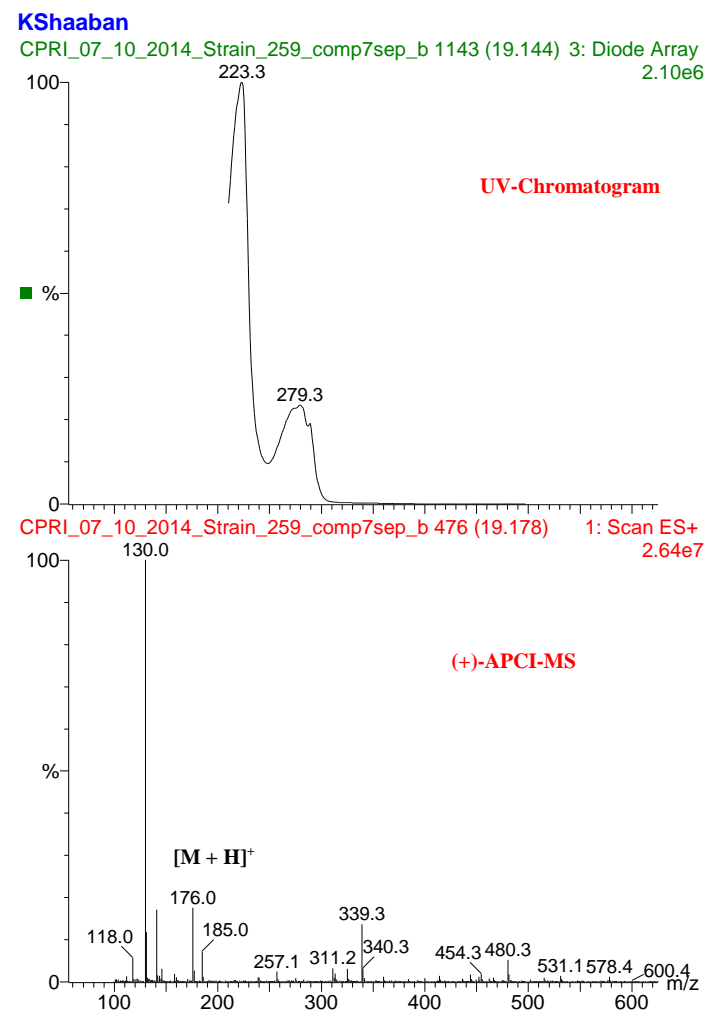

**Figure S37:** HPLC/UV/APCI-MS analyses of Indole-3-acetic acid (**7**). HPLC-conditions: Detection wavelength 270 nm; solvent A: H<sub>2</sub>O/0.1% Formic acid; solvent B: acetonitrile; flow rate: 0.5 mL min<sup>-1</sup>; 0-4 min, 90% A; 4-22 min, 90-0% A (linear gradient); 22-27 min 0% A; 27-35 min 0-90% A (linear gradient).

Sample: khaled\_A\_Shaaban  
File: xp  
Pulse Sequence: s2pul

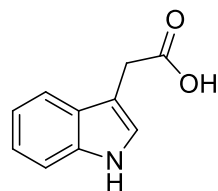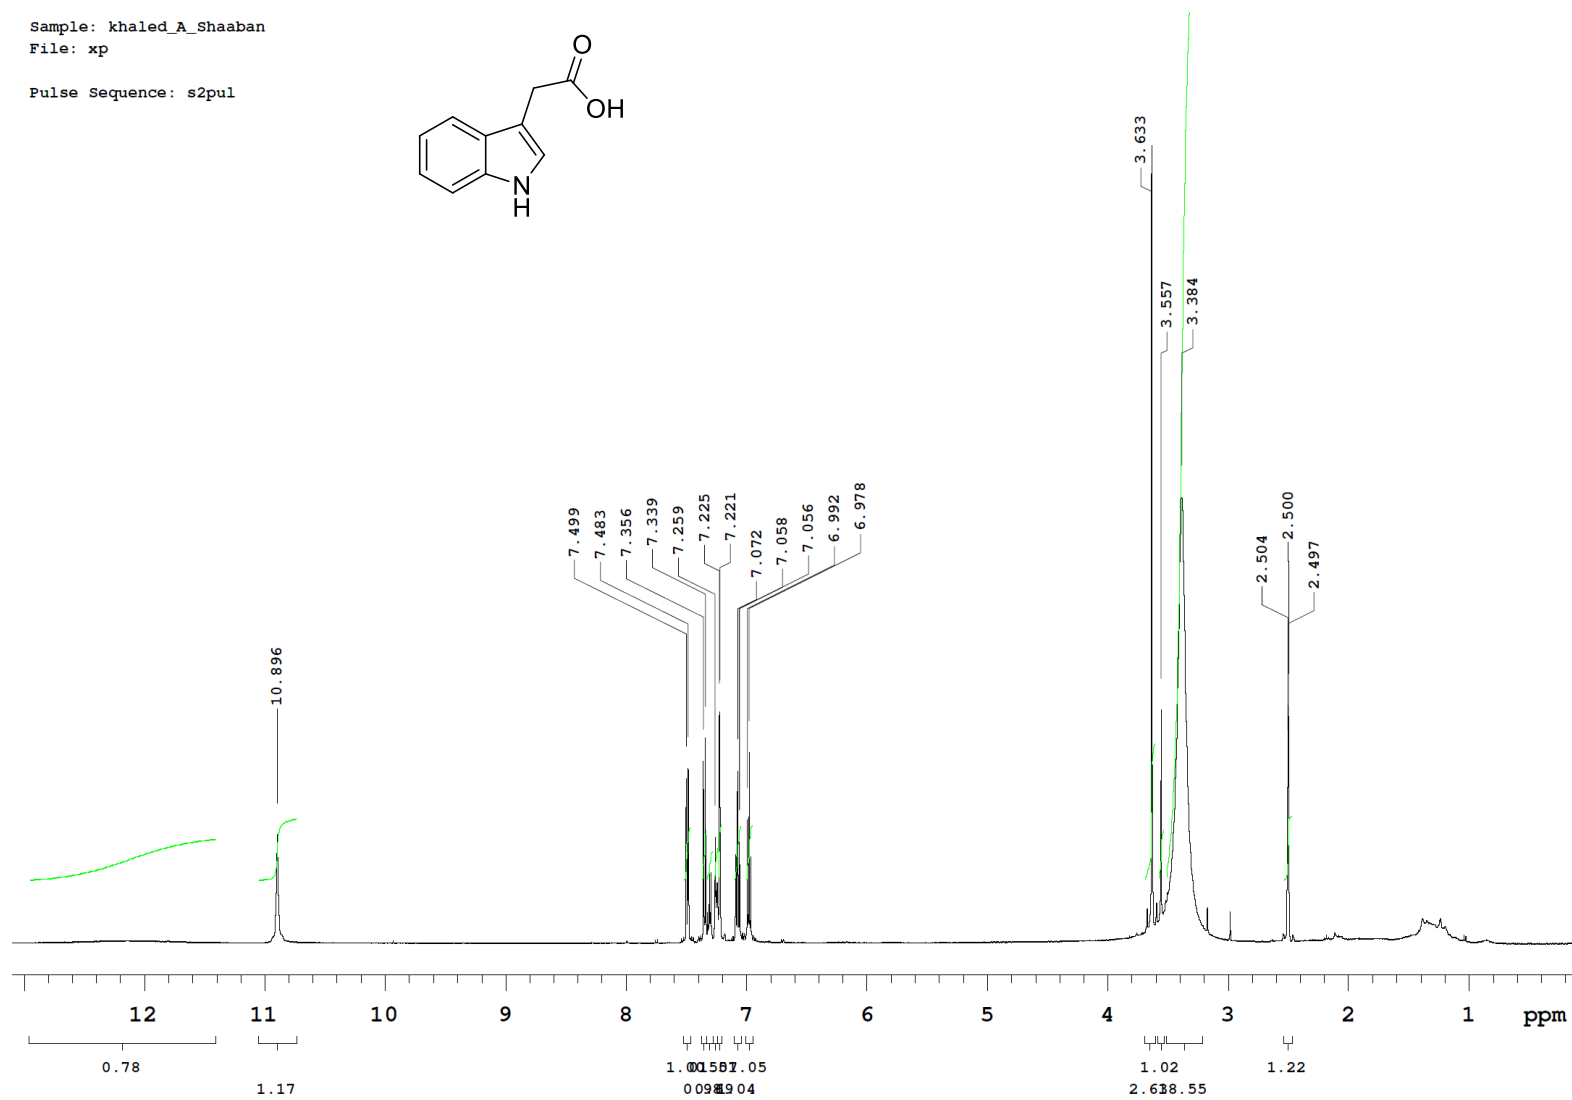

Figure S38: <sup>1</sup>H NMR spectrum (DMSO-*d*<sub>6</sub>, 500 MHz) of Indole-3-acetic acid (7)

Sample: khaled\_A\_Shaaban  
File: xp

Pulse Sequence: s2pul

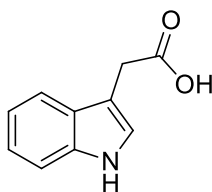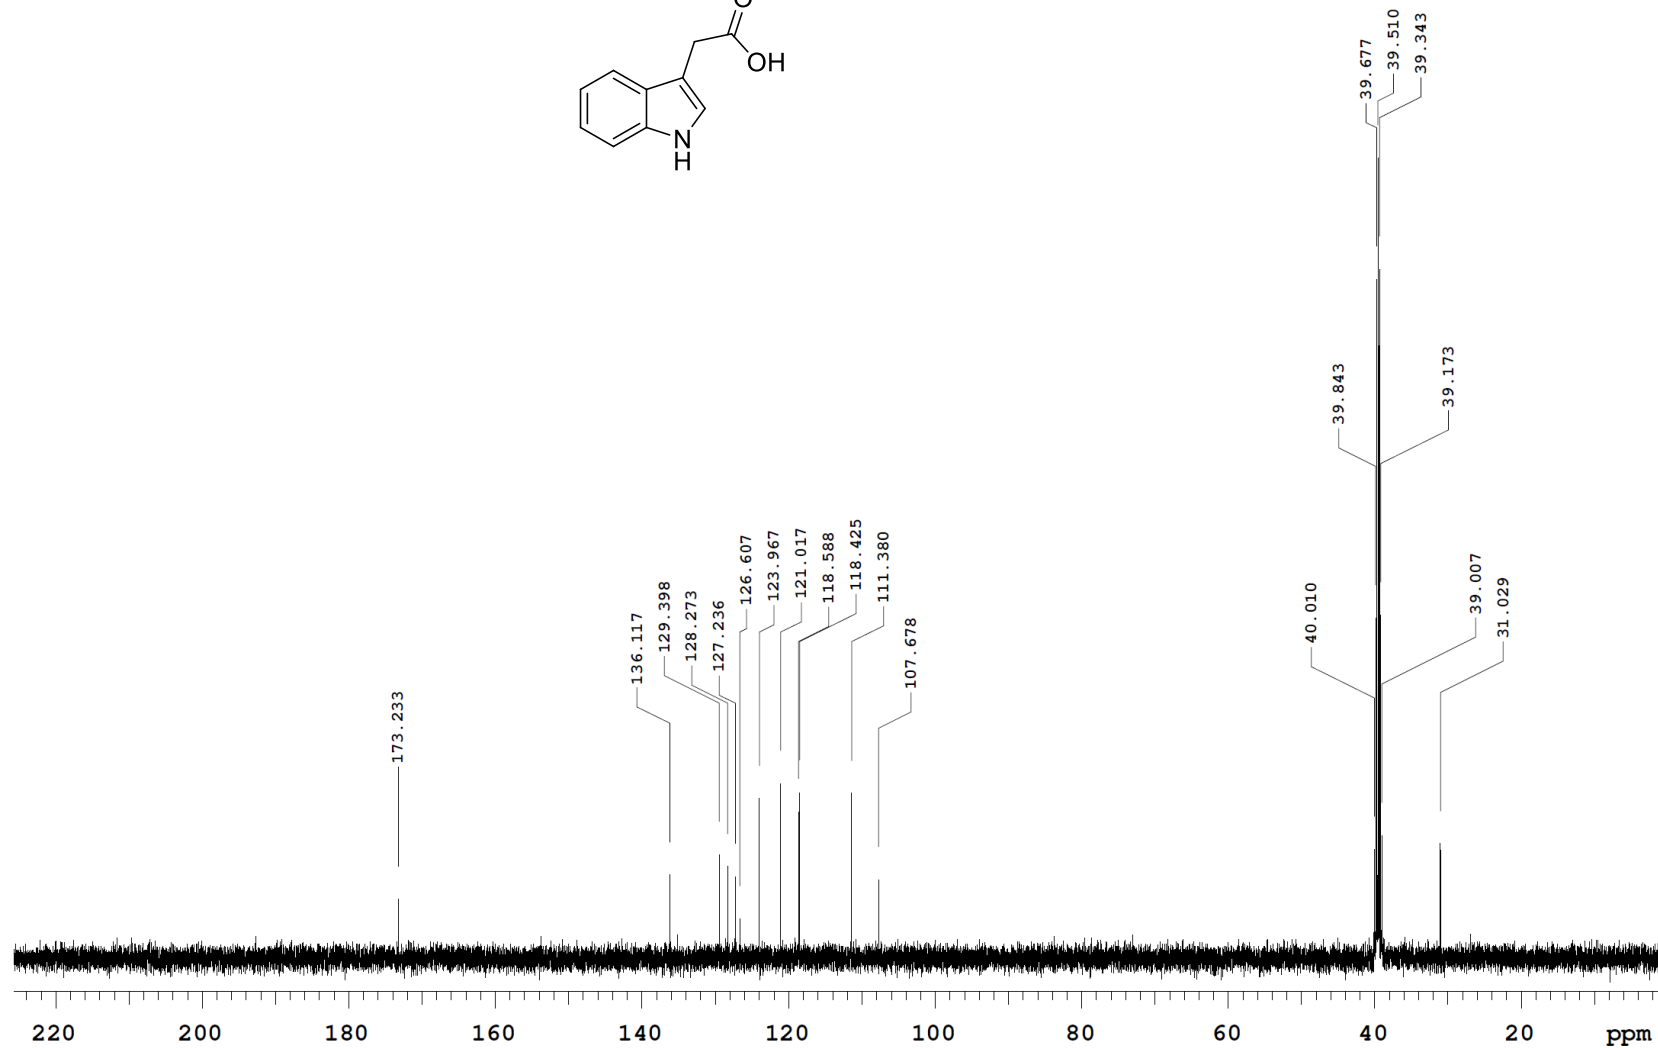

Figure S39: <sup>13</sup>C NMR spectrum (DMSO-*d*<sub>6</sub>, 125 MHz) of Indole-3-acetic acid (7)
